# Supplementary material
Source: PubMed Central journal article supplement (PMC4095995)
Supplement: NIHMS597171-supplement-01.pdf [file NIHMS597171-supplement-01.pdf]

## **Supplemental Methods**

### *Mice*

All mice were kept in a light-controlled environment with a 12:12 hour light-dark cycle and free access to standard mice chow and water. The WT and MMP-9 null colonies were bred in-house and maintained in the same room.

WT and MMP-9 null mice were each divided into one of 5 groups, with at least n=3 male and 3 female mice in each group. The groups were day (d) 0 no MI naïve controls, MI with saline, MI with Aliskiren (A, 50mg/kg/d), MI with Valsartan (V, 40mg/kg/d), and MI with Aliskiren and Valsartan (A+V). The exact sample sizes were: for WT, saline was 24, A was 23, V was 28, and A+V was 26; for Null, saline was 15, A was 22, V was 21, and A+V was 23. All mice enrolled in the study were used for the survival analysis.

MI was induced by permanently ligating the left anterior descending coronary artery as previously described.<sup>1</sup> The mice were anesthetized with 1-2% isoflurane in a 100% oxygen mix, intubated, and ventilated with a standard rodent ventilator (Harvard Ventilator). At 3 h post-MI, MI was confirmed by echocardiography, and the drug treatments were initiated by inserting an osmotic pump in the subcutaneous space between the scapula (Alzet<sup>®</sup> Model 2004, Durect Corporation, Cupertino, CA). Groups were randomized, with one individual (JZ) allocating mice, before the surgeries were performed, to one of the treatment groups. All other individuals were blinded to treatment groups throughout the analyses. The MI mice were all sacrificed at 28 d after MI, and genotypes were confirmed by tail genotyping.

### *Blood Pressure Measurement*

Blood pressure measurements were made by tail cuff plethysmography, as described previously.<sup>2</sup> To ensure accuracy and reproducibility, each mouse was trained for 3-5 days prior to the experiment. Conscious unanesthetized mice were placed on the specimen platform of the MC4000 Multi-Channel Blood Pressure Analysis System (Hatteras Instruments, Inc. Cary, NC 27514), and their tails were placed through tail cuffs and secured in place with tape. Following a 15 min warm-up period, 5 preliminary cycles were performed to allow the mice to adjust to the inflating cuff. For each mouse, 10 cycles were acquired and averaged. Measurements were taken at baseline and at 28 days post-MI.

### *Echocardiography*

Transthoracic echocardiography was performed using the Vevo 770 system (VisualSonics) with a 30-MHz image transducer. Mice were anesthetized with 0.5-2% isoflurane in a 100% oxygen mix. Electrocardiogram, heart rate, and body temperature were monitored throughout the imaging procedure, and heart rates were maintained at a minimum of 400 bpm. Volume measurements were taken from the parasternal long axis B-mode view. For each parameter, 3 images from consecutive cardiac cycles were measured and averaged.<sup>2, 3</sup> Because this study was not powered to detect differences between sexes, we normalized for potential effects due to differences in body size between sexes. To normalize, the individual mouse echocardiography volume data and hypertrophy index were normalized to the respective body weight, multiplied by 100, and averaged.

### *Tissue Collection*

Mice were sacrificed at 28 days post-MI under 2% isoflurane in a 100% oxygen mix.<sup>4</sup> A control group of no MI (day 0) control mice were also sacrificed for comparison of naïve hearts. To arrest the heart in diastole, the heart was flushed with cardioplegic solution.<sup>5</sup> LV tissue was separated from the right ventricle, weighed, and cut into 3 transverse sections and stained with 2,3,5-triphenyltetrazolium chloride (Sigma) for infarct area measurements. In each LV sample, the infarct (LVI) and remote (LVC) regions were separated and individually snap frozen for mRNA analysis (qRT-PCR arrays) or immunoblotting. The mid LV section was fixed in zinc-formalin for histology.<sup>6</sup> The tibia was measured for normalization of LV mass.

### *Immunohistochemistry*

Paraffin embedded samples were sectioned at 5  $\mu$ m. One set of sections was stained with picosirius red by incubating the slides in 0.05% Direct Red 80 (Sigma 365548, St. Louis, MO) in saturated picric acid for 90 minutes and washing in 0.01 N hydrochloric acid. For each section, 5-6 random images of the infarct area were scanned at 40X magnification. The image analysis was done on images that were 23 by 15 cm in size and enlarged on a 22 x 14 inch monitor, which allowed us to see the areas of positive stain using Image-Pro Plus 7.0 (MediaCybernetics, Inc. Rockville, MD).<sup>4</sup> A second set of sections was used for immunohistochemistry using a rat anti-Mac-3 antibody (Cedarlane CL8943AP, Burlington, NC) to stain for macrophages. Slides were incubated in primary antibody overnight followed by incubation in secondary antibody and substrate, using the

Vectastain Elite ABC Kit (Vector Laboratories, Burlingame, CA) and the HistoMark Black Kit (KPL, Gaithersburg, MD), according to product protocols. Macrophage numbers were counted using Image using Image-Pro Plus 7.0. The negative control was an isotype matched control antibody. Representative images were scanned at 60X magnification.

#### *Real Time PCR*

Inflammatory, ECM, and adhesion molecule genes were evaluated for mRNA levels using the Inflammatory Cytokines and Receptors and the Extracellular Matrix and Adhesion Molecules arrays (Qiagen PAMM-011A and PAMM-013A, Valencia, CA). LV infarct (LVI) and LV control (LVC) tissue were homogenized separately in TRIzol reagent (Invitrogen, 15596-026, Grand Island, NY) and RNA was extracted according to the manufacturer's protocol. cDNA synthesis was carried out using RT<sup>2</sup> First Strand Kit (Qiagen 330401) and prepared for loading the array with SYBR Green qPCR Mastermix (Qiagen 330522). Results were normalized to 5 housekeeping genes (Gusb, Hprt1, HSP90ab1, Gapdh, Actb) and analyzed based on  $2^{-\Delta Ct}$  values. None of these housekeeping genes were different among the groups evaluated.

#### *Plasma Analysis*

Blood was collected from the carotid artery by injecting the mouse with heparin (4 USP units per gram body weight) 5 min before sacrifice. Plasma was isolated by centrifugation at 2100 x g for 5 min, and then snap frozen and stored at -80°C.<sup>7</sup> Samples (100 µl) were sent to Rules Based Medicine (Austin, TX) for the Rodent Multi-Analyte profiling (MAP). 58 different plasma analytes were quantified by a Clinical Laboratory Improvement Amendments (CLIA)-certified biomarker testing laboratory using reproducible, quantitative, multiplexed immunoassays.

#### *Statistical and Data Analysis*

All results are reported as mean±SEM. Statistical analyses were performed using statistical software JMP (Cary, NC), SAS (Cary, NC), or Graphpad's InStat (La Jolla, CA). Survival probability was analyzed with three methods: nonparametric tests, Cox regression models, and parametric survival models.<sup>8</sup> The nonparametric tests used include log-rank and Wilcoxon tests that test the equality of two or more survival distributions. The nonparametric estimate was based on the Kaplan-Meier product-limit estimate<sup>9</sup>. The parametric survival model based on the best-fit probability distribution was used to estimate survival probability

curves and to test hypotheses concerning the effect of covariates on survival curve. Several parametric models were analyzed.<sup>10</sup> The appropriateness of the distribution was checked using three criteria: a lowest corrected Akaike information criterion value, linearity of distribution plot, and residuals.<sup>11</sup> The Shapiro-Wilk test was used to test the echocardiographic data for normality, and the Bartlett and Kendall, O'Brien, Brown and Forsythe, and Levene tests were used to test residuals for equal variance and interaction factors.

A sparse singular value decomposition (SSVD) biclustering algorithm was applied to divide the gene levels in this study into sub-matrices<sup>14</sup>. Data matrices were categorized into sub-matrices consisting of cluster members (genes or proteins) and the cluster attributes (experimental conditions or phenotypes) that have high similarity scores according to the biclustering algorithm.<sup>12</sup> This algorithm used a measure of coherent relation of a cluster member and its attributes at the same time<sup>13</sup>. Several layers of the original data matrix were analyzed using SSVD under appropriate sparsity conditions. The sparsity conditions pushed the unimportant entries of the data matrix towards zero while keeping the decomposed matrix similar to the original one. The significant genes were then selected for each layer of the matrix.<sup>14</sup> The original data was approximated by a summation of the sub-matrices.<sup>14</sup> Each sub-matrix represented a layer of the original matrix, with respect to its significance to the original data matrix. Each layer of the matrix was also decomposed by its singular values.<sup>15</sup>

All other statistical comparisons were done with ANOVA and a Student-Newman Keuls post-test. A  $p < 0.05$  was considered significant.

**Supplemental Table 1. ECM gene array results for WT remote (LVC) and infarct (LVI).**

| Gene    | LVC      |      |           |       |              |       |                   |       |                   |       |
|---------|----------|------|-----------|-------|--------------|-------|-------------------|-------|-------------------|-------|
|         | WT Day 0 |      | WT Saline |       | WT Aliskiren |       | WT Valsartan      |       | WT A+V            |       |
|         | AVG      | SEM  | AVG       | SEM   | AVG          | SEM   | AVG               | SEM   | AVG               | SEM   |
| Adamts1 | 8.21     | 0.99 | 13.35     | 2.45  | 16.95        | 3.72  | 13.02             | 3.03  | 12.53             | 2.68  |
| Adamts2 | 4.46     | 0.41 | 33.26*    | 6.34  | 22.81*       | 4.83  | 26.88*            | 4.25  | 27.13*            | 2.93  |
| Adamts5 | 0.93     | 0.10 | 1.64*     | 0.11  | 1.96*        | 0.14  | 1.75*             | 0.17  | 1.82*             | 0.25  |
| Adamts8 | 0.18     | 0.02 | 1.36      | 0.45  | 2.35         | 1.17  | 2.82              | 0.94  | 1.98              | 0.83  |
| Ctnna1  | 83.14    | 3.48 | 84.61     | 9.41  | 84.04        | 9.95  | 86.87             | 17.79 | 74.42             | 8.72  |
| Ctnna2  | 0.02     | 0.00 | 0.03      | 0.00  | 0.04         | 0.01  | 0.03              | 0.01  | 0.04              | 0.02  |
| Ctnnb1  | 62.18    | 3.27 | 61.62     | 3.90  | 66.76        | 7.84  | 63.88             | 6.56  | 66.59             | 2.14  |
| Cd44    | 2.49     | 0.10 | 6.89*     | 0.78  | 7.28*        | 0.89  | 6.95*             | 0.79  | 5.79*             | 0.49  |
| Cdh1    | 0.02     | 0.00 | 0.04      | 0.01  | 0.04         | 0.01  | 0.06              | 0.01  | 0.08*             | 0.02  |
| Cdh2    | 116.91   | 4.73 | 60.46*    | 7.97  | 61.86*       | 10.76 | 59.39*            | 7.35  | 49.80*            | 6.37  |
| Cdh3    | 0.02     | 0.00 | 0.03      | 0.00  | 0.03         | 0.01  | 0.03              | 0.01  | 0.04              | 0.02  |
| Cdh4    | 0.49     | 0.06 | 0.24*     | 0.02  | 0.24*        | 0.04  | 0.19*             | 0.02  | 0.23*             | 0.05  |
| Cntn1   | 0.02     | 0.00 | 0.03      | 0.00  | 0.04         | 0.01  | 0.04              | 0.01  | 0.04              | 0.02  |
| Col1a1  | 12.46    | 1.06 | 91.28*    | 13.37 | 54.12*       | 11.21 | 64.98*            | 11.70 | 73.32*            | 9.48  |
| Col2a1  | 0.02     | 0.00 | 0.08      | 0.02  | 0.09         | 0.02  | 0.12              | 0.05  | 0.16*             | 0.04  |
| Col3a1  | 43.21    | 3.41 | 317.19*   | 63.41 | 172.87       | 39.22 | 229.60*           | 55.73 | 259.91*           | 52.99 |
| Col4a1  | 49.20    | 4.02 | 109.50*   | 5.29  | 109.45*      | 8.83  | 122.14*           | 7.55  | 110.06*           | 8.83  |
| Col4a2  | 43.64    | 2.49 | 137.16*   | 21.38 | 112.32*      | 12.97 | 146.67*           | 33.84 | 105.38*           | 9.39  |
| Col4a3  | 0.26     | 0.03 | 0.85*     | 0.05  | 0.86*        | 0.14  | 0.87*             | 0.15  | 0.88*             | 0.12  |
| Col5a1  | 4.63     | 0.69 | 20.43*    | 2.19  | 15.49*       | 3.07  | 18.48*            | 2.52  | 19.27*            | 2.57  |
| Col6a1  | 12.46    | 0.75 | 56.92*    | 14.48 | 31.18        | 4.20  | 42.12             | 9.15  | 34.17             | 4.16  |
| Ctgf    | 34.56    | 2.76 | 211.83    | 39.95 | 172.08       | 43.89 | 271.36*           | 90.27 | 194.22            | 43.86 |
| Ecm1    | 6.50     | 0.47 | 38.81*    | 10.48 | 36.05*       | 5.53  | 35.46*            | 5.42  | 35.13*            | 3.91  |
| Emilin1 | 3.57     | 0.12 | 16.19*    | 3.07  | 11.57*       | 1.66  | 11.62*            | 1.01  | 11.69*            | 1.02  |
| Entpd1  | 2.54     | 0.19 | 3.86      | 0.63  | 5.57*        | 0.71  | 5.89*             | 0.84  | 5.70*             | 0.98  |
| Fbln1   | 2.39     | 0.09 | 11.50*    | 1.83  | 7.76*        | 1.58  | 7.27*             | 0.42  | 9.41*             | 1.52  |
| Fn1     | 4.60     | 0.21 | 32.62*    | 6.27  | 21.11*       | 4.72  | 26.35*            | 4.91  | 30.16*            | 4.12  |
| Hapln1  | 0.02     | 0.00 | 0.04      | 0.01  | 0.09*        | 0.02  | 0.04 <sup>‡</sup> | 0.01  | 0.04 <sup>‡</sup> | 0.02  |
| Hc      | 0.02     | 0.00 | 0.03      | 0.01  | 0.06         | 0.03  | 0.05              | 0.02  | 0.05              | 0.01  |
| Icam1   | 3.17     | 0.12 | 4.51      | 0.33  | 4.35         | 0.62  | 5.23*             | 0.68  | 5.47*             | 0.50  |
| Itga2   | 0.17     | 0.02 | 0.24      | 0.01  | 0.26         | 0.04  | 0.34              | 0.07  | 0.27              | 0.02  |
| Itga3   | 1.01     | 0.06 | 1.01      | 0.07  | 1.24         | 0.12  | 1.15              | 0.10  | 1.14              | 0.07  |
| Itga4   | 0.14     | 0.04 | 0.23      | 0.03  | 0.17         | 0.02  | 0.21              | 0.03  | 0.20              | 0.03  |
| Itga5   | 4.92     | 0.30 | 8.51      | 1.08  | 12.18*       | 3.00  | 11.09             | 1.18  | 9.15              | 0.99  |
| Itgae   | 0.06     | 0.02 | 0.14      | 0.03  | 0.14         | 0.04  | 0.16              | 0.05  | 0.18              | 0.03  |
| Itgal   | 0.41     | 0.05 | 0.30      | 0.05  | 0.17*        | 0.04  | 0.27              | 0.05  | 0.21*             | 0.02  |
| Itgam   | 1.29     | 0.05 | 2.24      | 0.32  | 2.90         | 0.51  | 3.25              | 0.84  | 3.06              | 0.40  |
| Itgav   | 7.32     | 0.41 | 10.53     | 1.28  | 11.00        | 1.30  | 12.67             | 1.68  | 11.58             | 1.11  |
| Itgax   | 0.17     | 0.02 | 0.49*     | 0.11  | 0.32         | 0.04  | 0.54*             | 0.10  | 0.44*             | 0.06  |
| Itgb1   | 79.47    | 3.63 | 81.82     | 6.24  | 90.53        | 4.82  | 96.97             | 8.49  | 90.16             | 3.32  |
| Itgb2   | 1.28     | 0.09 | 2.47      | 0.34  | 2.24         | 0.33  | 2.60              | 0.40  | 2.31              | 0.38  |

|               |       |      |         |       |         |       |         |       |         |       |
|---------------|-------|------|---------|-------|---------|-------|---------|-------|---------|-------|
| <b>Itgb3</b>  | 0.56  | 0.06 | 1.11    | 0.11  | 1.76*   | 0.33  | 1.75*   | 0.37  | 1.65*   | 0.35  |
| <b>Itgb4</b>  | 0.09  | 0.04 | 0.09    | 0.01  | 0.09    | 0.01  | 0.13    | 0.02  | 0.10    | 0.00  |
| <b>Lama1</b>  | 0.02  | 0.00 | 0.03    | 0.00  | 0.03    | 0.01  | 0.03    | 0.00  | 0.05    | 0.01  |
| <b>Lama2</b>  | 8.91  | 0.57 | 10.68   | 0.89  | 8.77    | 0.92  | 10.26   | 2.21  | 9.50    | 1.49  |
| <b>Lama3</b>  | 0.41  | 0.03 | 0.65    | 0.09  | 0.82    | 0.10  | 0.91    | 0.14  | 0.76    | 0.17  |
| <b>Lamb2</b>  | 29.75 | 2.63 | 48.26*  | 5.19  | 38.76   | 2.68  | 43.87   | 5.17  | 40.99   | 2.75  |
| <b>Lamb3</b>  | 1.24  | 0.11 | 0.67*   | 0.12  | 0.86*   | 0.13  | 0.76*   | 0.14  | 0.66*   | 0.06  |
| <b>Lamc1</b>  | 15.71 | 0.48 | 24.57   | 2.70  | 21.00   | 2.51  | 22.70   | 2.20  | 21.78   | 2.16  |
| <b>Mmp10</b>  | 0.02  | 0.00 | 0.03    | 0.00  | 0.03    | 0.01  | 0.03    | 0.00  | 0.04    | 0.02  |
| <b>Mmp11</b>  | 0.08  | 0.02 | 0.08    | 0.01  | 0.07    | 0.01  | 0.08    | 0.01  | 0.08    | 0.01  |
| <b>Mmp12</b>  | 0.02  | 0.00 | 0.03    | 0.00  | 0.04    | 0.01  | 0.03    | 0.00  | 0.04    | 0.02  |
| <b>Mmp13</b>  | 0.20  | 0.02 | 0.13    | 0.03  | 0.14    | 0.04  | 0.10    | 0.03  | 0.13    | 0.03  |
| <b>Mmp14</b>  | 2.23  | 0.21 | 5.05*   | 0.76  | 4.88*   | 0.79  | 5.52*   | 0.88  | 5.32*   | 0.46  |
| <b>Mmp15</b>  | 16.72 | 0.64 | 11.23*  | 1.38  | 11.85*  | 1.86  | 9.33*   | 1.69  | 10.14*  | 1.04  |
| <b>Mmp1a</b>  | 0.02  | 0.00 | 0.03    | 0.00  | 0.05    | 0.03  | 0.03    | 0.00  | 0.04    | 0.02  |
| <b>Mmp2</b>   | 7.11  | 0.21 | 34.99   | 7.70  | 19.91   | 4.40  | 34.66   | 14.54 | 23.96   | 4.72  |
| <b>Mmp3</b>   | 0.48  | 0.11 | 2.38*   | 0.41  | 3.57*   | 0.79  | 3.74*   | 0.80  | 2.79*   | 0.48  |
| <b>Mmp7</b>   | 0.02  | 0.00 | 0.03    | 0.00  | 0.04    | 0.01  | 0.03    | 0.01  | 0.04    | 0.02  |
| <b>Mmp8</b>   | 0.04  | 0.01 | 0.05    | 0.01  | 0.09    | 0.05  | 0.12    | 0.03  | 0.06    | 0.02  |
| <b>Mmp9</b>   | 0.13  | 0.03 | 0.06*   | 0.01  | 0.05*   | 0.01  | 0.05*   | 0.01  | 0.05*   | 0.02  |
| <b>Ncam1</b>  | 0.44  | 0.07 | 1.30*   | 0.16  | 1.37*   | 0.23  | 1.46*   | 0.26  | 1.28*   | 0.09  |
| <b>Ncam2</b>  | 0.02  | 0.00 | 0.03    | 0.00  | 0.03    | 0.01  | 0.03    | 0.00  | 0.05    | 0.02  |
| <b>Pecam1</b> | 29.35 | 1.12 | 29.70   | 1.65  | 40.61   | 3.28  | 42.66   | 5.60  | 40.72   | 3.83  |
| <b>Postn</b>  | 2.06  | 0.13 | 46.75*  | 12.10 | 25.91*  | 6.00  | 38.80*  | 6.32  | 43.69*  | 10.16 |
| <b>Sele</b>   | 0.37  | 0.03 | 0.34    | 0.05  | 0.41    | 0.07  | 0.39    | 0.05  | 0.37    | 0.07  |
| <b>Sell</b>   | 0.46  | 0.10 | 0.31    | 0.07  | 0.40    | 0.07  | 0.42    | 0.08  | 0.38    | 0.08  |
| <b>Selp</b>   | 0.13  | 0.02 | 0.51*   | 0.08  | 0.76*   | 0.16  | 0.84*   | 0.15  | 0.71*   | 0.17  |
| <b>Sgce</b>   | 1.87  | 0.15 | 4.20*   | 0.41  | 3.65*   | 0.29  | 3.89*   | 0.61  | 3.23*   | 0.61  |
| <b>Sparc</b>  | 35.12 | 2.64 | 136.85* | 22.21 | 111.85* | 18.42 | 151.48* | 27.15 | 134.22* | 16.29 |
| <b>Spock1</b> | 0.02  | 0.00 | 0.03    | 0.00  | 0.03    | 0.01  | 0.03    | 0.00  | 0.04    | 0.02  |
| <b>Spp1</b>   | 0.13  | 0.07 | 2.91    | 0.37  | 3.64    | 1.13  | 5.91*   | 1.78  | 4.09*   | 0.65  |
| <b>Syt1</b>   | 0.02  | 0.00 | 0.03    | 0.00  | 0.04    | 0.01  | 0.03    | 0.00  | 0.04    | 0.02  |
| <b>Tgfb1</b>  | 10.82 | 0.52 | 18.76*  | 1.78  | 20.60*  | 1.50  | 19.08*  | 2.21  | 21.13*  | 2.04  |
| <b>Thbs1</b>  | 4.14  | 0.97 | 47.05*  | 8.08  | 45.55*  | 9.25  | 55.61*  | 12.89 | 56.41*  | 12.59 |
| <b>Thbs2</b>  | 5.24  | 0.19 | 9.16    | 0.96  | 6.79    | 0.83  | 7.53    | 0.83  | 8.09    | 1.52  |
| <b>Thbs3</b>  | 0.87  | 0.04 | 3.97*   | 0.43  | 2.89*   | 0.38  | 3.80*   | 0.33  | 3.53*   | 0.44  |
| <b>Timp1</b>  | 0.02  | 0.00 | 0.05*   | 0.01  | 0.06*   | 0.01  | 0.04*   | 0.00  | 0.05*   | 0.01  |
| <b>Timp2</b>  | 19.02 | 0.74 | 46.36*  | 4.71  | 39.05*  | 5.38  | 40.06*  | 4.90  | 40.76*  | 4.28  |
| <b>Timp3</b>  | 15.53 | 1.67 | 30.91   | 4.41  | 32.62   | 4.82  | 39.19   | 9.54  | 35.72   | 4.70  |
| <b>Tnc</b>    | 0.15  | 0.02 | 1.95*   | 0.34  | 2.17*   | 0.60  | 1.75*   | 0.32  | 2.92*   | 0.34  |
| <b>Vcam1</b>  | 1.71  | 0.13 | 3.75    | 0.61  | 3.25    | 0.37  | 3.76    | 1.20  | 2.83    | 0.47  |
| <b>Vcan</b>   | 1.98  | 0.21 | 7.45*   | 0.76  | 8.18*   | 0.81  | 8.11*   | 1.09  | 8.37*   | 1.11  |
| <b>Vtn</b>    | 10.38 | 0.44 | 11.00   | 0.79  | 11.34   | 1.13  | 10.12   | 1.68  | 11.02   | 0.94  |

## LVI

|         | WT Saline |        | WT Aliskiren |        | WT Valsartan |        | WT A+V |        |
|---------|-----------|--------|--------------|--------|--------------|--------|--------|--------|
|         | AVG       | SEM    | AVG          | SEM    | AVG          | SEM    | AVG    | SEM    |
| Adamts1 | 7.38      | 2.03   | 7.59         | 1.31   | 13.11        | 6.58   | 6.55   | 0.94   |
| Adamts2 | 94.99     | 7.83   | 67.27        | 10.58  | 74.64        | 11.40  | 93.53  | 18.01  |
| Adamts5 | 3.39      | 0.44   | 3.64         | 0.62   | 3.99         | 1.08   | 8.92   | 4.12   |
| Adamts8 | 1.09      | 0.26   | 1.95         | 1.37   | 0.80         | 0.18   | 2.04   | 0.73   |
| Ctnna1  | 86.66     | 9.17   | 79.38        | 11.35  | 72.62        | 7.77   | 68.09  | 12.64  |
| Ctnna2  | 0.16      | 0.04   | 0.11         | 0.03   | 0.22         | 0.08   | 1.07   | 0.86   |
| Ctnnb1  | 74.36     | 4.70   | 69.14        | 4.57   | 80.91        | 8.05   | 88.24  | 5.96   |
| Cd44    | 11.09     | 1.45   | 10.08        | 0.93   | 8.21         | 1.35   | 7.38   | 0.78   |
| Cdh1    | 0.40      | 0.21   | 0.18         | 0.04   | 0.23         | 0.08   | 1.20   | 0.85   |
| Cdh2    | 59.47     | 5.42   | 52.28        | 5.07   | 64.15        | 8.67   | 61.66  | 8.59   |
| Cdh3    | 0.15      | 0.04   | 0.11         | 0.03   | 0.22         | 0.08   | 1.07   | 0.86   |
| Cdh4    | 0.20      | 0.04   | 0.14         | 0.02   | 0.27         | 0.07   | 1.07   | 0.86   |
| Cntn1   | 0.15      | 0.04   | 0.11         | 0.03   | 0.23         | 0.08   | 1.07   | 0.86   |
| Col1a1  | 400.80    | 67.64  | 314.65       | 67.60  | 298.15       | 56.45  | 492.76 | 126.53 |
| Col2a1  | 1.09      | 0.42   | 0.89         | 0.40   | 0.89         | 0.22   | 2.26   | 0.95   |
| Col3a1  | 461.33    | 72.18  | 315.27       | 149.44 | 379.07       | 83.43  | 415.35 | 88.27  |
| Col4a1  | 118.95    | 18.42  | 124.93       | 6.53   | 109.67       | 11.88  | 89.85  | 12.75  |
| Col4a2  | 134.39    | 20.26  | 146.28       | 14.58  | 129.50       | 23.48  | 104.18 | 20.47  |
| Col4a3  | 1.00      | 0.23   | 0.81         | 0.18   | 1.10         | 0.22   | 1.74   | 0.75   |
| Col5a1  | 32.68     | 5.31   | 32.77        | 4.90   | 34.62        | 5.57   | 30.54  | 5.17   |
| Col6a1  | 91.14     | 18.91  | 76.81        | 8.13   | 65.46        | 16.70  | 58.19  | 8.21   |
| Ctgf    | 682.58    | 140.72 | 503.72       | 113.64 | 538.43       | 115.84 | 617.86 | 149.81 |
| Ecm1    | 65.23     | 13.07  | 59.56        | 5.95   | 40.53        | 7.29   | 47.60  | 10.09  |
| Emilin1 | 29.83     | 3.10   | 25.47        | 2.12   | 22.67        | 3.63   | 27.57  | 6.19   |
| Entpd1  | 4.53      | 1.24   | 4.33         | 0.52   | 10.87        | 5.87   | 7.61   | 2.41   |
| Fbln1   | 30.15     | 4.64   | 27.04        | 4.48   | 23.33        | 3.93   | 34.46  | 7.71   |
| Fn1     | 62.90     | 7.35   | 64.81        | 13.39  | 58.24        | 9.67   | 69.21  | 13.92  |
| Hapln1  | 0.14      | 0.04   | 0.12         | 0.02   | 0.22         | 0.08   | 1.07   | 0.86   |
| Hc      | 0.27      | 0.10   | 0.12         | 0.03   | 0.24         | 0.08   | 1.52   | 1.15   |
| Icam1   | 8.59      | 0.83   | 7.48         | 0.84   | 7.49         | 1.25   | 7.87   | 0.91   |
| Itga2   | 0.39      | 0.14   | 0.44         | 0.09   | 0.46         | 0.09   | 1.48   | 0.80   |
| Itga3   | 1.86      | 0.53   | 1.28         | 0.09   | 1.92         | 0.47   | 3.13   | 1.15   |
| Itga4   | 0.35      | 0.06   | 0.31         | 0.07   | 0.37         | 0.06   | 1.14   | 0.85   |
| Itga5   | 12.72     | 0.70   | 12.12        | 1.87   | 16.52        | 1.66   | 15.04  | 2.82   |
| Itgae   | 0.69      | 0.10   | 0.69         | 0.24   | 0.71         | 0.21   | 1.61   | 0.77   |
| Itgal   | 0.36      | 0.08   | 0.42         | 0.10   | 0.55         | 0.12   | 1.65   | 0.76   |
| Itgam   | 9.32      | 1.70   | 8.24         | 1.75   | 8.26         | 2.11   | 14.75  | 3.99   |
| Itgav   | 42.73     | 8.97   | 27.41        | 5.59   | 40.11        | 11.73  | 61.50  | 15.91  |
| Itgax   | 2.37      | 0.56   | 1.50         | 0.29   | 2.98         | 1.15   | 4.43   | 1.84   |
| Itgb1   | 148.97    | 17.06  | 139.66       | 21.19  | 150.25       | 14.50  | 180.53 | 27.88  |
| Itgb2   | 6.08      | 0.88   | 5.06         | 0.76   | 4.39         | 0.84   | 6.68   | 1.04   |
| Itgb3   | 1.88      | 0.25   | 1.94         | 0.20   | 2.25         | 0.37   | 3.45   | 0.91   |

|               |        |       |        |       |        |       |        |       |
|---------------|--------|-------|--------|-------|--------|-------|--------|-------|
| <b>Itgb4</b>  | 0.22   | 0.04  | 0.19   | 0.02  | 0.33   | 0.08  | 1.12   | 0.85  |
| <b>Lama1</b>  | 0.14   | 0.04  | 0.11   | 0.03  | 0.22   | 0.08  | 1.07   | 0.86  |
| <b>Lama2</b>  | 12.40  | 2.85  | 11.24  | 2.57  | 8.66   | 1.66  | 8.06   | 0.94  |
| <b>Lama3</b>  | 0.70   | 0.10  | 0.83   | 0.18  | 0.67   | 0.09  | 1.66   | 0.76  |
| <b>Lamb2</b>  | 66.17  | 6.58  | 67.63  | 6.98  | 69.07  | 13.87 | 102.35 | 15.09 |
| <b>Lamb3</b>  | 0.58   | 0.11  | 0.67   | 0.13  | 0.74   | 0.14  | 1.47   | 0.79  |
| <b>Lamc1</b>  | 19.18  | 5.70  | 19.96  | 3.13  | 16.99  | 4.05  | 13.82  | 2.49  |
| <b>Mmp10</b>  | 0.15   | 0.04  | 0.11   | 0.03  | 0.22   | 0.08  | 1.07   | 0.86  |
| <b>Mmp11</b>  | 0.16   | 0.04  | 0.15   | 0.03  | 0.26   | 0.07  | 1.07   | 0.86  |
| <b>Mmp12</b>  | 0.18   | 0.03  | 0.11   | 0.03  | 0.22   | 0.08  | 1.07   | 0.86  |
| <b>Mmp13</b>  | 0.24   | 0.05  | 0.19   | 0.04  | 0.28   | 0.06  | 1.09   | 0.86  |
| <b>Mmp14</b>  | 12.78  | 2.18  | 10.44  | 1.86  | 13.88  | 2.58  | 16.36  | 2.78  |
| <b>Mmp15</b>  | 5.23   | 0.93  | 6.23   | 1.27  | 5.51   | 0.99  | 5.99   | 1.03  |
| <b>Mmp1a</b>  | 0.14   | 0.04  | 0.11   | 0.03  | 0.22   | 0.08  | 1.07   | 0.86  |
| <b>Mmp2</b>   | 51.25  | 14.31 | 49.35  | 16.88 | 44.26  | 15.75 | 38.56  | 11.71 |
| <b>Mmp3</b>   | 8.55   | 1.33  | 8.33   | 2.08  | 12.67  | 3.36  | 10.54  | 3.55  |
| <b>Mmp7</b>   | 0.15   | 0.04  | 0.11   | 0.03  | 0.22   | 0.08  | 1.07   | 0.86  |
| <b>Mmp8</b>   | 0.16   | 0.04  | 0.12   | 0.03  | 0.27   | 0.07  | 1.09   | 0.86  |
| <b>Mmp9</b>   | 0.16   | 0.04  | 0.36   | 0.23  | 0.22   | 0.08  | 1.07   | 0.86  |
| <b>Ncam1</b>  | 4.14   | 0.43  | 3.74   | 0.96  | 5.56   | 1.25  | 5.39   | 1.24  |
| <b>Ncam2</b>  | 0.14   | 0.04  | 0.11   | 0.03  | 0.22   | 0.08  | 1.07   | 0.86  |
| <b>Pecam1</b> | 20.90  | 4.50  | 29.01  | 3.68  | 33.43  | 4.69  | 37.22  | 5.24  |
| <b>Postn</b>  | 44.87  | 5.80  | 41.71  | 12.45 | 37.31  | 7.57  | 34.01  | 7.73  |
| <b>Sele</b>   | 0.22   | 0.04  | 0.25   | 0.03  | 0.28   | 0.06  | 1.08   | 0.86  |
| <b>Sell</b>   | 0.61   | 0.09  | 0.62   | 0.07  | 1.00   | 0.44  | 1.78   | 1.10  |
| <b>Selp</b>   | 1.22   | 0.21  | 1.19   | 0.26  | 1.82   | 0.87  | 1.67   | 0.75  |
| <b>Sgce</b>   | 5.78   | 0.94  | 5.39   | 1.02  | 5.04   | 1.03  | 6.71   | 0.99  |
| <b>Sparc</b>  | 328.15 | 48.66 | 296.63 | 63.29 | 312.67 | 53.30 | 267.34 | 76.21 |
| <b>Spock1</b> | 0.15   | 0.04  | 0.11   | 0.03  | 0.22   | 0.08  | 1.07   | 0.86  |
| <b>Spp1</b>   | 14.53  | 3.07  | 15.01  | 3.88  | 16.68  | 5.05  | 16.49  | 4.88  |
| <b>Syt1</b>   | 0.14   | 0.04  | 0.11   | 0.03  | 0.22   | 0.08  | 1.07   | 0.86  |
| <b>Tgfb1</b>  | 32.71  | 3.64  | 26.83  | 4.33  | 26.90  | 5.57  | 29.66  | 4.90  |
| <b>Thbs1</b>  | 224.76 | 31.47 | 193.30 | 49.15 | 210.55 | 55.57 | 253.48 | 69.51 |
| <b>Thbs2</b>  | 21.08  | 1.29  | 19.05  | 5.54  | 17.30  | 3.77  | 25.43  | 5.18  |
| <b>Thbs3</b>  | 10.84  | 1.14  | 7.86   | 0.72  | 10.68  | 2.74  | 17.91  | 3.85  |
| <b>Timp1</b>  | 0.16   | 0.04  | 0.12   | 0.02  | 0.23   | 0.08  | 1.07   | 0.86  |
| <b>Timp2</b>  | 166.07 | 15.85 | 112.24 | 22.56 | 122.90 | 21.32 | 166.52 | 32.63 |
| <b>Timp3</b>  | 76.95  | 6.76  | 58.39  | 7.86  | 59.65  | 6.30  | 63.89  | 10.41 |
| <b>Tnc</b>    | 5.12   | 0.33  | 5.39   | 1.46  | 6.13   | 1.31  | 5.95   | 0.83  |
| <b>Vcam1</b>  | 9.42   | 1.01  | 6.76   | 1.89  | 7.02   | 1.84  | 6.71   | 0.80  |
| <b>Vcan</b>   | 11.69  | 0.47  | 10.56  | 0.90  | 10.49  | 1.48  | 10.79  | 1.37  |
| <b>Vtn</b>    | 4.13   | 1.10  | 6.07   | 1.78  | 4.51   | 1.19  | 6.17   | 1.84  |

Values are reported as  $2^{-\Delta\Delta CT}$  levels x 100. n=6/group. \* p<0.05 vs. day 0; † p<0.05 vs. saline; ‡ p<0.05 vs. Aliskiren; § p<0.05 vs. Valsartan



**Supplemental Table 2. ECM gene array results for MMP-9 null remote (LVC) and infarct (LVI).**

| Gene    | LVC        |       |             |       |                |       |                |       |          |       |
|---------|------------|-------|-------------|-------|----------------|-------|----------------|-------|----------|-------|
|         | Null Day 0 |       | Null Saline |       | Null Aliskiren |       | Null Valsartan |       | Null A+V |       |
|         | AVG        | SEM   | AVG         | SEM   | AVG            | SEM   | AVG            | SEM   | AVG      | SEM   |
| Adamts1 | 8.00       | 1.10  | 12.27       | 1.52  | 9.37           | 2.50  | 10.34          | 1.38  | 11.94    | 2.04  |
| Adamts2 | 6.08       | 0.55  | 27.57*      | 3.72  | 35.70*         | 10.91 | 31.11*         | 3.96  | 27.16*   | 4.18  |
| Adamts5 | 1.24       | 0.16  | 2.16        | 0.21  | 2.37           | 0.51  | 2.05           | 0.24  | 2.06     | 0.15  |
| Adamts8 | 0.15       | 0.02  | 0.97        | 0.24  | 3.26           | 2.23  | 1.63           | 0.64  | 1.55     | 0.32  |
| Ctnna1  | 73.46      | 8.31  | 89.70       | 11.17 | 77.88          | 8.75  | 76.24          | 9.89  | 76.24    | 10.05 |
| Ctnna2  | 0.02       | 0.00  | 0.04        | 0.01  | 0.05           | 0.01  | 0.06           | 0.02  | 0.04     | 0.01  |
| Ctnnb1  | 57.76      | 1.83  | 67.84       | 3.96  | 70.50          | 6.18  | 66.33          | 5.60  | 64.19    | 4.79  |
| Cd44    | 3.71       | 0.43  | 7.79*       | 0.94  | 7.32*          | 1.36  | 6.53           | 0.81  | 6.53     | 0.48  |
| Cdh1    | 0.03       | 0.01  | 0.07        | 0.01  | 0.08           | 0.02  | 0.06           | 0.02  | 0.08     | 0.02  |
| Cdh2    | 93.03      | 4.32  | 58.26*      | 2.91  | 56.34*         | 6.19  | 56.36*         | 7.71  | 50.70*   | 5.97  |
| Cdh3    | 0.02       | 0.00  | 0.04        | 0.01  | 0.05           | 0.01  | 0.05           | 0.02  | 0.04     | 0.01  |
| Cdh4    | 0.45       | 0.10  | 0.21*       | 0.04  | 0.21*          | 0.04  | 0.19*          | 0.05  | 0.18*    | 0.04  |
| Cntn1   | 0.02       | 0.00  | 0.04        | 0.01  | 0.05           | 0.01  | 0.09           | 0.04  | 0.04     | 0.01  |
| Col1a1  | 16.77      | 1.03  | 66.73       | 11.78 | 99.72*         | 27.08 | 85.99*         | 12.94 | 67.74    | 13.98 |
| Col2a1  | 0.02       | 0.00  | 0.09        | 0.03  | 0.21           | 0.16  | 0.10           | 0.03  | 0.09     | 0.03  |
| Col3a1  | 75.48      | 12.62 | 187.53      | 28.82 | 196.62         | 48.20 | 185.78         | 38.31 | 173.78   | 23.71 |
| Col4a1  | 95.66      | 9.26  | 118.46      | 10.49 | 121.24         | 7.80  | 135.17         | 4.84  | 108.68   | 19.45 |
| Col4a2  | 79.76      | 10.48 | 127.08      | 12.40 | 122.36         | 13.81 | 133.55         | 9.89  | 141.66*  | 17.25 |
| Col4a3  | 0.31       | 0.04  | 0.68*       | 0.04  | 0.80*          | 0.12  | 0.68*          | 0.16  | 0.75*    | 0.08  |
| Col5a1  | 7.41       | 0.67  | 15.61*      | 1.85  | 20.10*         | 4.07  | 19.14*         | 1.75  | 15.11*   | 1.97  |
| Col6a1  | 16.79      | 2.28  | 38.60       | 4.53  | 41.68          | 8.99  | 40.73          | 9.02  | 37.85    | 6.67  |
| Ctgf    | 38.09      | 2.84  | 132.75*     | 22.02 | 112.96         | 58.76 | 114.93         | 23.53 | 104.27   | 16.99 |
| Ecm1    | 9.17       | 1.36  | 36.98*      | 8.57  | 35.74*         | 8.29  | 32.10*         | 4.94  | 33.62*   | 4.23  |
| Emilin1 | 4.74       | 0.43  | 12.98       | 1.75  | 13.43          | 1.93  | 12.92          | 3.21  | 12.30    | 2.34  |
| Entpd1  | 2.74       | 0.13  | 3.80        | 0.27  | 5.51           | 1.34  | 4.65           | 0.89  | 4.57     | 0.76  |
| Fbln1   | 3.50       | 0.42  | 10.25       | 1.31  | 15.02*         | 4.76  | 10.99          | 2.19  | 9.07     | 1.67  |
| Fn1     | 7.26       | 0.51  | 23.24*      | 3.10  | 24.87*         | 5.16  | 21.69*         | 3.56  | 20.02*   | 3.53  |
| Hapln1  | 0.02       | 0.00  | 0.04        | 0.01  | 0.07           | 0.02  | 0.07           | 0.02  | 0.04     | 0.01  |
| Hc      | 0.05       | 0.03  | 0.05        | 0.01  | 0.05           | 0.01  | 0.11           | 0.07  | 0.06     | 0.01  |
| Icam1   | 4.02       | 0.23  | 5.97        | 0.48  | 5.78           | 1.09  | 5.26           | 0.46  | 5.46     | 0.80  |
| Itga2   | 0.24       | 0.04  | 0.24        | 0.03  | 0.21           | 0.03  | 0.40           | 0.11  | 0.25     | 0.03  |
| Itga3   | 1.05       | 0.06  | 1.18        | 0.08  | 1.34           | 0.21  | 1.43           | 0.24  | 1.06     | 0.07  |
| Itga4   | 0.16       | 0.02  | 0.21        | 0.01  | 0.22           | 0.03  | 0.22           | 0.03  | 0.19     | 0.03  |
| Itga5   | 5.66       | 0.34  | 9.29        | 0.69  | 10.25          | 1.23  | 13.72*         | 3.03  | 8.74     | 0.72  |
| Itgae   | 0.18       | 0.04  | 0.19        | 0.03  | 0.32           | 0.10  | 0.29           | 0.06  | 0.20     | 0.04  |
| Itgal   | 0.47       | 0.03  | 0.31        | 0.06  | 0.45           | 0.12  | 0.37           | 0.05  | 0.22     | 0.04  |
| Itgam   | 1.57       | 0.06  | 3.33        | 0.30  | 4.48*          | 1.13  | 3.99*          | 0.46  | 3.17     | 0.48  |
| Itgav   | 7.15       | 0.44  | 10.40       | 0.70  | 15.56*         | 2.53  | 12.71          | 2.18  | 11.46    | 1.74  |
| Itgax   | 0.38       | 0.07  | 0.44        | 0.04  | 0.71           | 0.19  | 0.62           | 0.13  | 0.51     | 0.12  |
| Itgb1   | 77.96      | 1.21  | 94.74       | 7.46  | 72.47          | 14.82 | 102.62         | 7.97  | 83.24    | 4.57  |
| Itgb2   | 1.73       | 0.15  | 2.55        | 0.26  | 2.81           | 0.50  | 2.83           | 0.22  | 2.74     | 0.31  |
| Itgb3   | 0.76       | 0.07  | 1.67*       | 0.19  | 1.80*          | 0.24  | 1.85*          | 0.29  | 1.86*    | 0.38  |
| Itgb4   | 0.06       | 0.01  | 0.10        | 0.01  | 0.15*          | 0.03  | 0.11           | 0.02  | 0.12     | 0.01  |

|               |       |      |         |       |         |       |         |       |         |       |
|---------------|-------|------|---------|-------|---------|-------|---------|-------|---------|-------|
| <b>Lama1</b>  | 0.02  | 0.00 | 0.04    | 0.01  | 0.05    | 0.01  | 0.05    | 0.02  | 0.04    | 0.01  |
| <b>Lama2</b>  | 7.71  | 0.53 | 8.22    | 0.89  | 7.25    | 1.47  | 6.58    | 0.91  | 8.23    | 1.21  |
| <b>Lama3</b>  | 0.60  | 0.05 | 0.93    | 0.11  | 0.77    | 0.10  | 0.95    | 0.15  | 0.75    | 0.12  |
| <b>Lamb2</b>  | 31.01 | 2.99 | 47.77   | 6.13  | 43.60   | 6.06  | 54.54   | 12.42 | 43.08   | 2.67  |
| <b>Lamb3</b>  | 1.14  | 0.11 | 0.88    | 0.16  | 0.87    | 0.14  | 1.22    | 0.55  | 0.80    | 0.05  |
| <b>Lamc1</b>  | 20.31 | 0.79 | 22.93   | 1.43  | 24.31   | 2.55  | 24.06   | 3.96  | 23.90   | 1.37  |
| <b>Mmp10</b>  | 0.02  | 0.00 | 0.04    | 0.01  | 0.05    | 0.01  | 0.05    | 0.02  | 0.04    | 0.01  |
| <b>Mmp11</b>  | 0.07  | 0.01 | 0.08    | 0.01  | 0.10    | 0.02  | 0.10    | 0.01  | 0.08    | 0.01  |
| <b>Mmp12</b>  | 0.02  | 0.00 | 0.04    | 0.01  | 0.05    | 0.01  | 0.10    | 0.05  | 0.04    | 0.01  |
| <b>Mmp13</b>  | 0.45  | 0.08 | 0.17*   | 0.02  | 0.15*   | 0.02  | 0.28    | 0.13  | 0.12*   | 0.02  |
| <b>Mmp14</b>  | 3.94  | 0.22 | 5.80    | 0.58  | 7.80*   | 1.00  | 7.63*   | 1.09  | 6.37    | 1.12  |
| <b>Mmp15</b>  | 21.35 | 0.92 | 10.48*  | 0.74  | 11.17*  | 1.39  | 13.65*  | 2.48  | 11.00*  | 0.63  |
| <b>Mmp1a</b>  | 0.02  | 0.00 | 0.04    | 0.01  | 0.05    | 0.01  | 0.05    | 0.02  | 0.04    | 0.01  |
| <b>Mmp2</b>   | 10.08 | 1.01 | 22.94*  | 3.05  | 22.43*  | 4.08  | 18.94*  | 0.94  | 20.91*  | 2.72  |
| <b>Mmp3</b>   | 0.52  | 0.12 | 2.60*   | 0.42  | 4.07*   | 1.02  | 4.34*   | 0.94  | 3.25*   | 0.49  |
| <b>Mmp7</b>   | 0.02  | 0.00 | 0.04    | 0.01  | 0.05    | 0.01  | 0.06    | 0.03  | 0.04    | 0.01  |
| <b>Mmp8</b>   | 0.03  | 0.00 | 0.24    | 0.11  | 0.17    | 0.07  | 0.27    | 0.16  | 0.10    | 0.02  |
| <b>Ncam1</b>  | 0.51  | 0.03 | 1.12    | 0.09  | 1.54*   | 0.36  | 1.37*   | 0.22  | 1.20    | 0.21  |
| <b>Ncam2</b>  | 0.02  | 0.00 | 0.04    | 0.01  | 0.05    | 0.01  | 0.07    | 0.04  | 0.04    | 0.01  |
| <b>Pecam1</b> | 42.96 | 2.27 | 37.28   | 2.96  | 40.49   | 4.06  | 46.89   | 5.70  | 38.25   | 4.08  |
| <b>Postn</b>  | 2.36  | 0.22 | 20.56*  | 3.59  | 20.06*  | 1.84  | 18.16*  | 3.51  | 19.39*  | 3.80  |
| <b>Sele</b>   | 0.43  | 0.07 | 0.33    | 0.05  | 0.24    | 0.03  | 0.32    | 0.07  | 0.39    | 0.08  |
| <b>Sell</b>   | 0.29  | 0.05 | 0.41    | 0.07  | 0.42    | 0.05  | 0.65    | 0.28  | 0.35    | 0.08  |
| <b>Selp</b>   | 0.17  | 0.03 | 0.71    | 0.11  | 0.71    | 0.20  | 0.72    | 0.19  | 0.56    | 0.08  |
| <b>Sgce</b>   | 2.50  | 0.56 | 3.39    | 0.25  | 4.24    | 0.76  | 3.61    | 0.81  | 3.84    | 0.37  |
| <b>Sparc</b>  | 63.54 | 5.18 | 119.77* | 15.52 | 134.51* | 26.71 | 128.04* | 8.65  | 110.51* | 11.40 |
| <b>Spock1</b> | 0.02  | 0.00 | 0.04    | 0.01  | 0.05    | 0.01  | 0.05    | 0.02  | 0.04    | 0.01  |
| <b>Spp1</b>   | 0.08  | 0.03 | 3.39    | 1.03  | 3.87    | 1.70  | 2.76    | 0.72  | 2.16    | 0.60  |
| <b>Syt1</b>   | 0.02  | 0.00 | 0.04    | 0.01  | 0.05    | 0.01  | 0.05    | 0.02  | 0.04    | 0.01  |
| <b>Tgfb1</b>  | 9.01  | 0.55 | 18.86*  | 1.69  | 17.88*  | 3.61  | 14.66   | 1.85  | 18.21*  | 1.93  |
| <b>Thbs1</b>  | 6.77  | 1.04 | 35.34   | 7.04  | 58.22   | 23.84 | 31.76   | 5.70  | 28.52   | 4.75  |
| <b>Thbs2</b>  | 5.69  | 0.19 | 7.39    | 0.94  | 8.45    | 2.45  | 6.57    | 0.95  | 7.08    | 0.83  |
| <b>Thbs3</b>  | 1.25  | 0.13 | 3.75*   | 0.31  | 4.32*   | 0.94  | 3.66*   | 0.60  | 3.11*   | 0.35  |
| <b>Timp1</b>  | 0.02  | 0.00 | 0.05    | 0.01  | 0.06    | 0.01  | 0.07*   | 0.02  | 0.04    | 0.01  |
| <b>Timp2</b>  | 18.46 | 1.65 | 42.01   | 5.48  | 58.24*  | 15.15 | 42.54   | 6.79  | 40.96   | 6.00  |
| <b>Timp3</b>  | 11.48 | 0.70 | 30.39*  | 2.91  | 24.84*  | 7.03  | 29.43*  | 5.35  | 30.74*  | 3.47  |
| <b>Tnc</b>    | 0.65  | 0.10 | 2.58*   | 0.26  | 3.19*   | 0.47  | 3.41*   | 0.56  | 3.11*   | 0.53  |
| <b>Vcam1</b>  | 2.13  | 0.25 | 3.53    | 0.35  | 3.65    | 0.79  | 2.97    | 0.67  | 3.43    | 0.64  |
| <b>Vcan</b>   | 2.51  | 0.20 | 7.42*   | 0.95  | 8.65*   | 0.36  | 8.42*   | 1.13  | 7.27*   | 0.82  |
| <b>Vtn</b>    | 14.73 | 0.52 | 11.93   | 0.97  | 10.15   | 1.20  | 11.57   | 0.82  | 11.65   | 1.40  |

|         | LVI         |       |                |        |                |       |          |        |
|---------|-------------|-------|----------------|--------|----------------|-------|----------|--------|
|         | Null Saline |       | Null Aliskiren |        | Null Valsartan |       | Null A+V |        |
|         | AVG         | SEM   | AVG            | SEM    | AVG            | SEM   | AVG      | SEM    |
| Adamts1 | 9.71        | 2.29  | 8.72           | 0.72   | 9.14           | 2.95  | 8.13     | 1.79   |
| Adamts2 | 84.33       | 13.13 | 77.43          | 21.40  | 80.44          | 27.51 | 84.35    | 14.00  |
| Adamts5 | 6.58        | 1.09  | 5.46           | 2.28   | 4.51           | 1.16  | 5.39     | 1.33   |
| Adamts8 | 10.60       | 9.94  | 0.93           | 0.34   | 3.91           | 1.84  | 0.80     | 0.14   |
| Ctnna1  | 76.21       | 11.05 | 74.94          | 14.77  | 69.03          | 10.62 | 79.66    | 13.59  |
| Ctnna2  | 0.51        | 0.17  | 0.49           | 0.36   | 0.43           | 0.20  | 0.33     | 0.13   |
| Ctnnb1  | 80.52       | 6.16  | 75.51          | 7.36   | 61.32          | 10.39 | 80.76    | 6.30   |
| Cd44    | 9.89        | 1.94  | 8.13           | 1.84   | 6.36           | 1.24  | 11.54    | 2.00   |
| Cdh1    | 0.53        | 0.17  | 0.51           | 0.35   | 0.44           | 0.20  | 0.35     | 0.13   |
| Cdh2    | 53.61       | 6.60  | 46.82          | 7.13   | 52.02          | 8.27  | 59.14    | 4.49   |
| Cdh3    | 0.51        | 0.17  | 0.49           | 0.36   | 0.43           | 0.20  | 0.33     | 0.13   |
| Cdh4    | 0.52        | 0.17  | 0.62           | 0.34   | 0.50           | 0.19  | 0.37     | 0.12   |
| Cntn1   | 0.64        | 0.28  | 0.49           | 0.36   | 0.43           | 0.20  | 0.33     | 0.13   |
| Col1a1  | 391.99      | 77.48 | 239.14         | 73.05  | 299.89         | 71.65 | 392.33   | 78.12  |
| Col2a1  | 0.64        | 0.16  | 0.79           | 0.36   | 0.58           | 0.20  | 1.51     | 0.59   |
| Col3a1  | 320.12      | 55.57 | 204.84         | 137.04 | 247.01         | 20.68 | 421.37   | 106.62 |
| Col4a1  | 93.82       | 8.62  | 111.23         | 7.79   | 102.91         | 10.35 | 107.28   | 11.77  |
| Col4a2  | 103.61      | 12.36 | 117.17         | 9.48   | 117.96         | 14.02 | 132.33   | 20.98  |
| Col4a3  | 1.10        | 0.09  | 0.96           | 0.27   | 0.82           | 0.16  | 1.07     | 0.15   |
| Col5a1  | 21.14       | 1.59  | 29.68          | 9.23   | 25.66          | 6.94  | 30.81    | 5.89   |
| Col6a1  | 57.20       | 9.82  | 54.64          | 8.44   | 49.53          | 6.85  | 81.62    | 19.09  |
| Ctgf    | 436.25      | 88.16 | 111.45         | 264.66 | 303.33         | 54.56 | 659.14   | 158.46 |
| Ecm1    | 50.44       | 7.11  | 45.77          | 8.92   | 31.94          | 4.42  | 56.42    | 11.62  |
| Emilin1 | 23.45       | 3.68  | 17.51          | 4.45   | 18.20          | 3.64  | 30.17    | 6.58   |
| Entpd1  | 3.31        | 0.48  | 4.48           | 0.34   | 4.01           | 0.83  | 6.24     | 1.17   |
| Fbln1   | 28.77       | 4.42  | 22.84          | 6.52   | 19.42          | 3.69  | 25.41    | 3.33   |
| Fn1     | 41.85       | 4.87  | 41.74          | 9.86   | 36.40          | 5.83  | 53.23    | 6.01   |
| Hapln1  | 0.51        | 0.17  | 0.49           | 0.36   | 0.43           | 0.20  | 0.35     | 0.13   |
| Hc      | 0.68        | 0.29  | 0.49           | 0.36   | 0.44           | 0.20  | 0.33     | 0.13   |
| Icam1   | 8.57        | 1.72  | 6.90           | 1.44   | 5.64           | 1.01  | 9.00     | 1.92   |
| Itga2   | 0.61        | 0.14  | 0.72           | 0.34   | 0.55           | 0.18  | 0.65     | 0.10   |
| Itga3   | 1.84        | 0.37  | 1.43           | 0.21   | 1.99           | 0.44  | 2.13     | 0.31   |
| Itga4   | 0.59        | 0.15  | 0.68           | 0.33   | 0.47           | 0.19  | 0.44     | 0.11   |
| Itga5   | 11.59       | 1.76  | 14.22          | 5.02   | 14.50          | 2.66  | 15.13    | 2.56   |
| Itgae   | 1.64        | 0.51  | 0.72           | 0.32   | 0.82           | 0.26  | 1.20     | 0.44   |
| Itgal   | 0.65        | 0.18  | 0.85           | 0.30   | 0.67           | 0.17  | 0.80     | 0.17   |
| Itgam   | 11.55       | 1.66  | 5.97           | 1.22   | 8.55           | 2.46  | 10.30    | 1.71   |
| Itgav   | 42.36       | 6.79  | 23.12          | 5.20   | 37.93          | 9.95  | 37.28    | 7.19   |
| Itgax   | 4.24        | 1.52  | 2.21           | 1.11   | 3.36           | 1.49  | 4.06     | 1.90   |
| Itgb1   | 131.02      | 14.08 | 135.61         | 23.63  | 152.21         | 22.04 | 143.66   | 17.07  |
| Itgb2   | 6.26        | 0.72  | 4.82           | 1.21   | 4.81           | 1.22  | 6.49     | 1.07   |
| Itgb3   | 2.73        | 0.43  | 2.19           | 0.55   | 1.94           | 0.31  | 2.50     | 0.19   |
| Itgb4   | 0.57        | 0.16  | 0.54           | 0.35   | 0.47           | 0.19  | 0.39     | 0.12   |
| Lama1   | 0.51        | 0.17  | 0.49           | 0.36   | 0.43           | 0.20  | 0.33     | 0.13   |
| Lama2   | 7.27        | 2.15  | 7.52           | 1.33   | 5.47           | 1.15  | 7.03     | 2.05   |

|               |        |       |        |       |        |       |        |       |
|---------------|--------|-------|--------|-------|--------|-------|--------|-------|
| <b>Lama3</b>  | 1.03   | 0.26  | 1.14   | 0.28  | 1.18   | 0.39  | 0.68   | 0.12  |
| <b>Lamb2</b>  | 77.90  | 7.45  | 86.39  | 24.29 | 86.12  | 24.19 | 80.42  | 13.00 |
| <b>Lamb3</b>  | 1.49   | 0.60  | 1.38   | 0.50  | 1.10   | 0.24  | 0.92   | 0.27  |
| <b>Lamc1</b>  | 12.53  | 2.25  | 19.63  | 5.07  | 13.62  | 2.09  | 14.80  | 3.80  |
| <b>Mmp10</b>  | 0.51   | 0.17  | 0.49   | 0.36  | 0.43   | 0.20  | 0.33   | 0.13  |
| <b>Mmp11</b>  | 0.52   | 0.17  | 0.55   | 0.35  | 0.44   | 0.20  | 0.36   | 0.13  |
| <b>Mmp12</b>  | 0.67   | 0.29  | 0.51   | 0.36  | 0.44   | 0.20  | 0.34   | 0.13  |
| <b>Mmp13</b>  | 0.88   | 0.48  | 0.56   | 0.34  | 0.56   | 0.19  | 0.46   | 0.12  |
| <b>Mmp14</b>  | 15.84  | 2.69  | 10.95  | 2.31  | 14.79  | 4.31  | 15.22  | 2.57  |
| <b>Mmp15</b>  | 6.65   | 0.87  | 7.11   | 1.92  | 9.18   | 1.32  | 4.98   | 0.89  |
| <b>Mmp1a</b>  | 0.51   | 0.17  | 0.49   | 0.36  | 0.43   | 0.20  | 0.33   | 0.13  |
| <b>Mmp2</b>   | 29.10  | 4.45  | 52.63  | 27.41 | 26.27  | 5.50  | 44.64  | 14.09 |
| <b>Mmp3</b>   | 11.17  | 2.18  | 8.72   | 2.45  | 9.52   | 2.22  | 6.61   | 0.66  |
| <b>Mmp7</b>   | 0.51   | 0.17  | 0.49   | 0.36  | 0.43   | 0.20  | 0.33   | 0.13  |
| <b>Mmp8</b>   | 0.77   | 0.30  | 0.49   | 0.36  | 0.46   | 0.19  | 0.39   | 0.13  |
| <b>Ncam1</b>  | 4.17   | 0.75  | 2.87   | 0.69  | 3.62   | 0.98  | 3.92   | 0.65  |
| <b>Ncam2</b>  | 0.51   | 0.17  | 0.49   | 0.36  | 0.43   | 0.20  | 0.33   | 0.13  |
| <b>Pecam1</b> | 23.99  | 2.96  | 32.25  | 4.99  | 36.68  | 5.05  | 30.83  | 4.32  |
| <b>Postn</b>  | 25.25  | 3.00  | 24.50  | 4.17  | 19.46  | 1.57  | 30.21  | 3.33  |
| <b>Sele</b>   | 0.69   | 0.27  | 0.60   | 0.34  | 0.53   | 0.18  | 0.47   | 0.14  |
| <b>Sell</b>   | 1.38   | 0.84  | 0.72   | 0.32  | 0.92   | 0.40  | 0.66   | 0.12  |
| <b>Selp</b>   | 1.69   | 0.59  | 1.08   | 0.36  | 1.70   | 0.55  | 1.52   | 0.34  |
| <b>Sgce</b>   | 3.90   | 0.59  | 3.81   | 0.46  | 3.50   | 0.50  | 4.41   | 0.58  |
| <b>Sparc</b>  | 230.82 | 35.07 | 162.01 | 44.88 | 209.15 | 18.04 | 256.81 | 28.71 |
| <b>Spock1</b> | 0.51   | 0.17  | 0.49   | 0.36  | 0.43   | 0.20  | 0.33   | 0.13  |
| <b>Spp1</b>   | 14.22  | 2.93  | 8.14   | 3.64  | 9.79   | 2.68  | 16.30  | 3.94  |
| <b>Syt1</b>   | 0.51   | 0.17  | 0.49   | 0.36  | 0.43   | 0.20  | 0.33   | 0.13  |
| <b>Tgfb1</b>  | 26.69  | 4.33  | 26.22  | 6.51  | 19.51  | 2.99  | 38.44  | 9.38  |
| <b>Thbs1</b>  | 145.51 | 29.24 | 84.55  | 34.94 | 105.10 | 21.92 | 214.59 | 68.43 |
| <b>Thbs2</b>  | 13.67  | 2.07  | 13.79  | 5.64  | 9.95   | 1.80  | 19.66  | 3.76  |
| <b>Thbs3</b>  | 13.41  | 2.31  | 7.48   | 1.84  | 11.62  | 4.61  | 11.46  | 2.04  |
| <b>Timp1</b>  | 0.52   | 0.17  | 0.50   | 0.36  | 0.43   | 0.20  | 0.33   | 0.13  |
| <b>Timp2</b>  | 124.50 | 21.98 | 79.90  | 20.62 | 99.10  | 23.24 | 126.72 | 21.50 |
| <b>Timp3</b>  | 61.78  | 9.16  | 40.94  | 7.74  | 44.23  | 9.11  | 59.06  | 5.82  |
| <b>Tnc</b>    | 5.78   | 0.81  | 6.84   | 2.24  | 6.92   | 1.40  | 6.46   | 0.91  |
| <b>Vcam1</b>  | 6.75   | 1.20  | 4.70   | 1.02  | 3.99   | 1.05  | 8.82   | 2.46  |
| <b>Vcan</b>   | 13.54  | 2.47  | 9.39   | 0.97  | 10.37  | 1.32  | 10.63  | 0.95  |
| <b>Vtn</b>    | 5.69   | 1.62  | 9.07   | 2.01  | 5.38   | 1.40  | 3.94   | 1.64  |

Values are reported as  $2^{-\Delta CT}$  levels x 100. n=6/group. \* p<0.05 vs. day 0.

**Supplemental Table 3. Inflammatory gene array results for WT remote (LVC) and infarct (LVI).**

| Gene          | LVC      |       |           |       |                   |       |              |       |                      |        |
|---------------|----------|-------|-----------|-------|-------------------|-------|--------------|-------|----------------------|--------|
|               | WT Day 0 |       | WT Saline |       | WT Aliskiren      |       | WT Valsartan |       | WT A+V               |        |
|               | AVG      | SEM   | AVG       | SEM   | AVG               | SEM   | AVG          | SEM   | AVG                  | SEM    |
| <b>Abcf1</b>  | 219.59   | 8.83  | 267.69    | 41.57 | 263.75*           | 22.28 | 283.26*      | 25.90 | 363.20*              | 82.58  |
| <b>Bcl6</b>   | 52.01    | 8.02  | 50.79     | 7.60  | 49.78             | 6.52  | 41.52        | 5.80  | 78.61                | 32.02  |
| <b>Cxcr5</b>  | 0.66     | 0.10  | 1.03      | 0.22  | 0.95              | 0.06  | 0.83         | 0.29  | 1.36                 | 0.42   |
| <b>C3</b>     | 179.93   | 21.15 | 249.35    | 22.38 | 269.64            | 42.64 | 264.52       | 60.21 | 401.76               | 105.54 |
| <b>Casp1</b>  | 12.00    | 0.91  | 20.56     | 3.36  | 18.99             | 1.90  | 22.36        | 2.48  | 30.15*               | 6.17   |
| <b>Ccl1</b>   | 0.21     | 0.03  | 0.31      | 0.09  | 0.39              | 0.13  | 0.40         | 0.07  | 0.58                 | 0.18   |
| <b>Ccl11</b>  | 7.67     | 1.87  | 1.52*     | 0.89  | 2.28*             | 0.83  | 0.81*        | 0.22  | 1.42*                | 0.35   |
| <b>Ccl12</b>  | 11.30    | 1.70  | 24.09     | 5.36  | 14.25             | 2.21  | 16.40        | 3.04  | 21.48                | 1.90   |
| <b>Ccl17</b>  | 0.29     | 0.09  | 1.24      | 0.22  | 1.80              | 0.74  | 3.17         | 1.58  | 3.13                 | 0.58   |
| <b>Ccl19</b>  | 18.31    | 2.26  | 47.11     | 11.92 | 75.47             | 15.13 | 65.05        | 10.39 | 78.01                | 12.98  |
| <b>Ccl2</b>   | 12.84    | 1.72  | 18.65     | 1.16  | 19.25             | 4.51  | 17.89        | 4.02  | 42.12                | 18.34  |
| <b>Ccl20</b>  | 0.15     | 0.01  | 0.29      | 0.09  | 0.37              | 0.13  | 0.37         | 0.05  | 0.59                 | 0.17   |
| <b>Ccl22</b>  | 0.36     | 0.08  | 0.58      | 0.12  | 0.99              | 0.32  | 0.57         | 0.08  | 0.99                 | 0.24   |
| <b>Ccl24</b>  | 1.05     | 0.19  | 0.67      | 0.21  | 0.82              | 0.22  | 1.20         | 0.22  | 1.58                 | 0.75   |
| <b>Ccl25</b>  | 2.03     | 0.08  | 2.57      | 0.37  | 3.36              | 0.70  | 2.63         | 0.62  | 4.30                 | 1.54   |
| <b>Ccl3</b>   | 0.55     | 0.08  | 1.35      | 0.29  | 0.57              | 0.10  | 0.89         | 0.22  | 1.46                 | 0.42   |
| <b>Ccl4</b>   | 1.70     | 0.20  | 4.19*     | 0.55  | 1.75 <sup>†</sup> | 0.26  | 2.78         | 0.57  | 4.10* <sup>‡</sup>   | 0.68   |
| <b>Ccl5</b>   | 4.99     | 0.88  | 7.94      | 1.36  | 5.38              | 0.81  | 6.73         | 1.44  | 7.18                 | 2.28   |
| <b>Ccl6</b>   | 4.84     | 1.11  | 4.49      | 1.29  | 5.85              | 0.98  | 5.86         | 1.46  | 9.64                 | 2.68   |
| <b>Ccl7</b>   | 17.06    | 1.92  | 11.85     | 2.32  | 7.89*             | 2.09  | 9.56         | 1.54  | 13.13                | 2.11   |
| <b>Ccl8</b>   | 5.16     | 0.69  | 17.86     | 4.60  | 19.40             | 5.30  | 15.66        | 3.49  | 24.33                | 5.80   |
| <b>Ccl9</b>   | 7.23     | 0.67  | 16.74     | 3.21  | 22.96             | 5.53  | 21.95        | 4.65  | 26.51                | 6.60   |
| <b>Ccr1</b>   | 4.16     | 0.33  | 7.03      | 1.29  | 6.56              | 1.05  | 6.41         | 1.26  | 9.39                 | 2.14   |
| <b>Ccr2</b>   | 5.23     | 0.60  | 9.98      | 2.13  | 8.11              | 1.78  | 9.18         | 1.52  | 11.55                | 1.46   |
| <b>Ccr3</b>   | 7.87     | 0.92  | 12.14     | 1.61  | 11.38             | 2.08  | 9.27         | 1.90  | 16.57* <sup>§</sup>  | 1.61   |
| <b>Ccr4</b>   | 0.26     | 0.03  | 0.74      | 0.24  | 1.75              | 1.27  | 0.83         | 0.16  | 1.35                 | 0.41   |
| <b>Ccr5</b>   | 7.80     | 0.69  | 17.09*    | 3.05  | 15.77             | 2.22  | 13.76*       | 2.23  | 25.18* <sup>†§</sup> | 1.94   |
| <b>Ccr6</b>   | 0.56     | 0.07  | 1.24      | 0.30  | 0.90              | 0.18  | 1.00         | 0.32  | 0.93                 | 0.17   |
| <b>Ccr7</b>   | 1.62     | 0.22  | 1.64      | 0.47  | 1.91              | 0.37  | 2.21         | 0.23  | 5.29                 | 2.89   |
| <b>Ccr8</b>   | 0.23     | 0.05  | 0.30      | 0.09  | 0.37              | 0.13  | 0.37         | 0.06  | 0.56                 | 0.18   |
| <b>Ccr9</b>   | 3.88     | 0.50  | 2.53      | 0.29  | 3.72              | 1.08  | 3.02         | 0.72  | 4.23                 | 1.15   |
| <b>Crp</b>    | 0.15     | 0.01  | 0.28      | 0.09  | 0.37              | 0.13  | 0.31         | 0.06  | 0.56                 | 0.18   |
| <b>Cx3cl1</b> | 35.75    | 1.78  | 139.38    | 34.70 | 95.09             | 19.18 | 126.30       | 25.26 | 163.05*              | 41.97  |
| <b>Cxcl1</b>  | 1.38     | 0.22  | 2.06      | 0.90  | 1.48              | 0.35  | 1.48         | 0.43  | 1.71                 | 0.54   |
| <b>Cxcl10</b> | 2.91     | 0.71  | 7.76      | 2.79  | 2.75              | 0.93  | 7.56         | 1.74  | 4.28                 | 0.87   |
| <b>Cxcl11</b> | 0.43     | 0.04  | 0.57      | 0.19  | 0.67              | 0.20  | 0.59         | 0.09  | 0.93                 | 0.35   |
| <b>Cxcl12</b> | 429.50   | 39.59 | 284.64    | 43.88 | 376.00            | 32.97 | 346.95       | 47.14 | 553.24               | 157.35 |
| <b>Cxcl13</b> | 0.46     | 0.14  | 1.59      | 0.24  | 1.61              | 0.38  | 3.61         | 1.44  | 3.55                 | 1.76   |
| <b>Cxcl15</b> | 0.15     | 0.01  | 0.28      | 0.09  | 0.37              | 0.13  | 0.33         | 0.05  | 0.56                 | 0.18   |
| <b>Pf4</b>    | 65.85    | 9.47  | 46.14     | 7.37  | 43.42             | 5.43  | 38.40        | 4.06  | 58.27                | 20.71  |
| <b>Cxcl5</b>  | 2.20     | 0.55  | 1.56      | 0.43  | 0.88              | 0.17  | 0.65*        | 0.19  | 1.09                 | 0.18   |
| <b>Cxcl9</b>  | 26.73    | 6.29  | 11.91     | 2.47  | 7.35*             | 2.85  | 7.15*        | 1.57  | 14.75                | 7.13   |
| <b>Cxcr3</b>  | 0.64     | 0.25  | 1.02      | 0.26  | 0.71              | 0.17  | 0.76         | 0.36  | 1.34                 | 0.46   |

|                 |        |       |        |       |        |       |        |        |          |        |
|-----------------|--------|-------|--------|-------|--------|-------|--------|--------|----------|--------|
| <b>Ccr10</b>    | 7.37   | 1.76  | 5.66   | 1.26  | 6.95   | 1.98  | 6.92   | 1.43   | 11.42    | 4.19   |
| <b>Ifng</b>     | 0.16   | 0.02  | 0.33   | 0.09  | 0.42   | 0.12  | 0.47   | 0.13   | 0.56     | 0.18   |
| <b>Il10</b>     | 0.70   | 0.13  | 0.76   | 0.13  | 1.00   | 0.27  | 1.12   | 0.24   | 1.58     | 0.80   |
| <b>Il10ra</b>   | 4.70   | 0.48  | 8.23   | 1.35  | 7.02   | 0.73  | 9.13   | 1.04   | 11.67    | 4.80   |
| <b>Il10rb</b>   | 350.01 | 9.72  | 300.28 | 21.87 | 290.94 | 21.06 | 293.55 | 31.28  | 425.91   | 105.68 |
| <b>Il11</b>     | 0.22   | 0.05  | 0.87*  | 0.19  | 0.71   | 0.17  | 0.64   | 0.07   | 1.35*†‡§ | 0.18   |
| <b>Il13</b>     | 0.15   | 0.01  | 0.29   | 0.09  | 0.47   | 0.12  | 0.44   | 0.08   | 0.88     | 0.43   |
| <b>Il13ra1</b>  | 86.25  | 6.54  | 81.35  | 5.22  | 71.46  | 4.12  | 85.36  | 5.56   | 125.80   | 39.55  |
| <b>Il15</b>     | 140.40 | 5.48  | 66.64* | 9.27  | 95.80  | 16.28 | 67.77* | 13.25  | 108.25   | 22.65  |
| <b>Il16</b>     | 10.45  | 1.00  | 9.75   | 0.81  | 11.60  | 1.77  | 11.52  | 1.37   | 14.60    | 3.78   |
| <b>Il17b</b>    | 0.15   | 0.01  | 0.30   | 0.09  | 0.40   | 0.12  | 0.38   | 0.03   | 0.64     | 0.20   |
| <b>Il18</b>     | 1.86   | 0.04  | 3.77   | 0.76  | 3.50   | 0.38  | 3.75   | 0.75   | 6.50     | 2.36   |
| <b>Il1a</b>     | 0.55   | 0.09  | 0.43   | 0.10  | 0.59   | 0.11  | 0.82   | 0.12   | 0.77     | 0.26   |
| <b>Il1b</b>     | 3.73   | 0.64  | 4.17   | 1.35  | 2.67   | 0.61  | 4.36   | 1.63   | 6.88     | 3.58   |
| <b>Il1f6</b>    | 0.16   | 0.02  | 0.35   | 0.11  | 0.38   | 0.13  | 0.48   | 0.12   | 0.61     | 0.17   |
| <b>Il1f8</b>    | 0.16   | 0.01  | 0.30   | 0.09  | 0.48   | 0.18  | 0.46   | 0.12   | 0.63     | 0.17   |
| <b>Il1r1</b>    | 20.45  | 1.45  | 42.33  | 5.42  | 47.30  | 7.72  | 60.32  | 10.35  | 68.55*   | 18.77  |
| <b>Il1r2</b>    | 0.61   | 0.20  | 1.63   | 0.96  | 2.92   | 1.19  | 2.80   | 0.82   | 1.77     | 0.55   |
| <b>Il20</b>     | 0.15   | 0.01  | 0.31   | 0.09  | 0.37   | 0.13  | 0.46   | 0.12   | 0.56     | 0.18   |
| <b>Il2rb</b>    | 1.39   | 0.58  | 0.90   | 0.17  | 0.86   | 0.09  | 0.80   | 0.18   | 1.55     | 0.89   |
| <b>Il2rg</b>    | 27.35  | 1.60  | 29.04  | 1.20  | 28.49  | 2.50  | 28.05  | 1.72   | 48.64    | 18.77  |
| <b>Il3</b>      | 0.15   | 0.01  | 0.28   | 0.09  | 0.37   | 0.13  | 0.38   | 0.05   | 0.60     | 0.17   |
| <b>Il4</b>      | 0.23   | 0.04  | 0.37   | 0.09  | 0.70   | 0.17  | 0.67   | 0.08   | 1.04     | 0.44   |
| <b>Il5ra</b>    | 0.20   | 0.06  | 0.30   | 0.09  | 0.38   | 0.13  | 0.38   | 0.06   | 0.59     | 0.17   |
| <b>Il6ra</b>    | 16.59  | 0.94  | 23.78  | 3.95  | 35.85  | 8.50  | 28.50  | 7.28   | 52.70    | 18.69  |
| <b>Il6st</b>    | 417.74 | 70.50 | 388.96 | 32.56 | 362.58 | 20.47 | 401.47 | 52.40  | 521.92   | 143.40 |
| <b>Il8rb</b>    | 1.21   | 0.49  | 0.37   | 0.11  | 0.76   | 0.51  | 0.57   | 0.07   | 0.57     | 0.18   |
| <b>Itgam</b>    | 15.16  | 0.85  | 25.33  | 2.37  | 31.13  | 5.16  | 31.60  | 6.53   | 46.07*‡  | 9.66   |
| <b>Itgb2</b>    | 12.79  | 0.50  | 24.80  | 3.97  | 24.09  | 4.49  | 22.39  | 4.27   | 28.99    | 8.07   |
| <b>Lta</b>      | 0.17   | 0.01  | 0.28   | 0.09  | 0.40   | 0.12  | 0.33   | 0.05   | 0.67     | 0.26   |
| <b>Ltb</b>      | 2.19   | 0.30  | 2.57   | 0.34  | 2.96   | 0.83  | 1.76   | 0.39   | 2.72     | 0.66   |
| <b>Mif</b>      | 432.38 | 7.69  | 733.06 | 82.87 | 640.96 | 82.60 | 897.94 | 238.67 | 882.04   | 185.63 |
| <b>Scye1</b>    | 348.02 | 12.64 | 333.79 | 29.78 | 314.80 | 21.58 | 328.58 | 43.89  | 402.52   | 91.23  |
| <b>Spp1</b>     | 1.45   | 0.84  | 34.92  | 4.06  | 45.48* | 11.71 | 67.50* | 21.87  | 52.65*   | 8.44   |
| <b>Tgfb1</b>    | 91.18  | 6.47  | 95.10  | 8.29  | 113.65 | 9.43  | 121.60 | 13.18  | 209.55   | 84.33  |
| <b>Tnf</b>      | 1.36   | 0.22  | 1.61   | 0.38  | 0.96   | 0.20  | 1.16   | 0.30   | 2.28     | 0.81   |
| <b>Tnfrsf1a</b> | 34.07  | 1.36  | 46.50  | 4.86  | 44.10  | 4.60  | 63.30  | 15.70  | 70.64    | 19.97  |
| <b>Tnfrsf1b</b> | 14.54  | 0.87  | 29.70  | 3.06  | 29.85  | 3.81  | 26.93  | 2.99   | 45.54    | 15.23  |
| <b>Cd40lg</b>   | 0.24   | 0.06  | 0.31   | 0.09  | 0.38   | 0.13  | 0.47   | 0.19   | 0.57     | 0.18   |
| <b>Tollip</b>   | 78.67  | 3.48  | 72.90  | 5.68  | 73.30  | 3.25  | 76.73  | 5.92   | 106.54   | 36.50  |
| <b>Xcr1</b>     | 0.24   | 0.06  | 0.44   | 0.13  | 0.40   | 0.13  | 3.43   | 2.82   | 0.93     | 0.37   |

|        | LVI       |        |              |        |              |        |                      |        |
|--------|-----------|--------|--------------|--------|--------------|--------|----------------------|--------|
|        | WT Saline |        | WT Aliskiren |        | WT Valsartan |        | WT A+V               |        |
|        | AVG       | SEM    | AVG          | SEM    | AVG          | SEM    | AVG                  | SEM    |
| Abcf1  | 325.04    | 38.68  | 245.33       | 44.68  | 298.70       | 40.88  | 345.51               | 41.01  |
| Bcl6   | 117.45    | 16.96  | 107.27       | 25.80  | 105.46       | 26.89  | 125.62               | 29.50  |
| Cxcr5  | 2.47      | 0.48   | 4.12         | 1.30   | 4.96         | 3.05   | 9.32                 | 5.15   |
| C3     | 1154.35   | 376.08 | 676.97       | 182.60 | 961.84       | 192.37 | 1056.22              | 232.81 |
| Casp1  | 66.23     | 15.62  | 65.21        | 22.23  | 66.98        | 26.93  | 90.49                | 17.31  |
| Ccl1   | 2.02      | 0.62   | 1.05         | 0.27   | 1.85         | 0.56   | 5.46                 | 3.10   |
| Ccl11  | 2.29      | 1.01   | 32.12        | 30.85  | 2.24         | 0.71   | 5.18                 | 3.15   |
| Ccl12  | 23.04     | 1.60   | 20.02        | 5.12   | 19.87        | 4.84   | 21.45                | 6.29   |
| Ccl17  | 7.25      | 2.25   | 4.24         | 1.30   | 9.48         | 3.15   | 6.88                 | 2.95   |
| Ccl19  | 128.55    | 25.45  | 100.54       | 14.96  | 127.20       | 34.12  | 240.60               | 95.42  |
| Ccl2   | 26.92     | 3.75   | 20.49        | 4.55   | 29.94        | 7.64   | 28.49                | 8.34   |
| Ccl20  | 1.52      | 0.48   | 0.90         | 0.20   | 1.66         | 0.50   | 5.18                 | 3.15   |
| Ccl22  | 2.26      | 0.50   | 1.88         | 0.71   | 2.29         | 0.40   | 5.39                 | 3.11   |
| Ccl24  | 1.81      | 0.38   | 20.62        | 19.60  | 1.73         | 0.47   | 5.21                 | 3.15   |
| Ccl25  | 5.55      | 1.45   | 3.81         | 0.92   | 3.12         | 0.28   | 10.73 <sup>†‡§</sup> | 2.96   |
| Ccl3   | 2.93      | 0.23   | 43.63        | 40.23  | 2.70         | 0.37   | 10.16                | 5.70   |
| Ccl4   | 18.62     | 3.65   | 39.08        | 29.16  | 14.25        | 4.40   | 26.82                | 9.66   |
| Ccl5   | 19.58     | 3.82   | 44.87        | 28.37  | 22.81        | 4.45   | 25.01                | 7.25   |
| Ccl6   | 10.43     | 3.95   | 4.98         | 1.32   | 12.32        | 4.07   | 20.91                | 14.86  |
| Ccl7   | 21.01     | 4.94   | 16.32        | 3.45   | 16.42        | 3.74   | 26.49                | 12.61  |
| Ccl8   | 24.06     | 9.03   | 29.12        | 11.48  | 13.62        | 2.29   | 40.63                | 34.31  |
| Ccl9   | 42.22     | 10.81  | 31.32        | 8.73   | 34.42        | 7.01   | 83.34                | 37.12  |
| Ccr1   | 13.65     | 4.83   | 58.26        | 46.25  | 8.40         | 2.51   | 15.48                | 4.68   |
| Ccr2   | 14.02     | 3.45   | 30.29        | 12.85  | 12.86        | 2.54   | 29.14                | 8.68   |
| Ccr3   | 15.87     | 2.71   | 20.52        | 3.25   | 14.80        | 3.51   | 34.85                | 18.32  |
| Ccr4   | 1.59      | 0.50   | 2.74         | 1.35   | 2.77         | 0.86   | 16.44                | 13.10  |
| Ccr5   | 40.03     | 10.04  | 34.76        | 5.10   | 23.00        | 6.00   | 37.23                | 7.75   |
| Ccr6   | 4.64      | 1.34   | 9.74         | 6.81   | 3.12         | 0.59   | 8.04                 | 3.43   |
| Ccr7   | 5.11      | 1.51   | 4.51         | 1.37   | 5.81         | 2.60   | 11.55                | 5.67   |
| Ccr8   | 1.64      | 0.47   | 0.90         | 0.24   | 2.25         | 0.89   | 6.36                 | 3.18   |
| Ccr9   | 2.82      | 0.39   | 4.54         | 1.29   | 3.04         | 0.44   | 8.40                 | 4.18   |
| Crp    | 2.61      | 1.07   | 0.87         | 0.21   | 2.37         | 1.04   | 6.21                 | 3.26   |
| Cx3cl1 | 340.65    | 48.22  | 203.81       | 44.72  | 279.52       | 51.60  | 264.85               | 48.67  |
| Cxcl1  | 3.20      | 0.91   | 2.10         | 0.32   | 3.95         | 1.31   | 5.96                 | 3.04   |
| Cxcl10 | 13.31     | 2.66   | 10.33        | 2.03   | 20.96        | 5.03   | 20.67                | 9.66   |
| Cxcl11 | 3.25      | 1.87   | 1.60         | 0.36   | 1.97         | 0.43   | 7.24                 | 5.20   |
| Cxcl12 | 320.98    | 61.45  | 288.53       | 57.58  | 388.16       | 81.29  | 409.85               | 34.75  |
| Cxcl13 | 9.78      | 4.74   | 6.99         | 2.39   | 9.44         | 4.70   | 45.36                | 41.90  |
| Cxcl15 | 1.53      | 0.48   | 4.87         | 3.89   | 1.64         | 0.51   | 5.18                 | 3.15   |
| Pf4    | 45.34     | 5.76   | 45.24        | 10.62  | 50.08        | 5.15   | 56.09                | 14.91  |
| Cxcl5  | 2.21      | 0.47   | 30.69        | 26.06  | 3.90         | 0.42   | 13.49                | 6.59   |
| Cxcl9  | 2.46      | 0.63   | 4.61         | 0.73   | 3.46         | 0.85   | 6.34                 | 3.42   |
| Cxcr3  | 5.83      | 1.62   | 4.04         | 0.82   | 3.61         | 0.48   | 7.78                 | 2.90   |
| Ccr10  | 11.83     | 2.13   | 12.25        | 3.45   | 13.33        | 2.87   | 31.99 <sup>†‡§</sup> | 6.94   |

|                 |        |       |        |        |        |       |        |        |
|-----------------|--------|-------|--------|--------|--------|-------|--------|--------|
| <b>Ifng</b>     | 1.84   | 0.43  | 0.90   | 0.20   | 2.13   | 0.59  | 22.20  | 20.10  |
| <b>Il10</b>     | 1.82   | 0.38  | 4.89   | 2.83   | 1.85   | 0.43  | 17.09  | 14.70  |
| <b>Il10ra</b>   | 23.75  | 8.32  | 12.24  | 2.84   | 27.55  | 10.95 | 20.62  | 3.41   |
| <b>Il10rb</b>   | 258.62 | 46.29 | 214.34 | 24.91  | 223.36 | 22.80 | 289.63 | 44.90  |
| <b>Il11</b>     | 2.00   | 0.47  | 2.20   | 0.40   | 2.78   | 0.28  | 5.52   | 3.08   |
| <b>Il13</b>     | 1.77   | 0.47  | 8.77   | 7.68   | 1.68   | 0.49  | 10.60  | 8.22   |
| <b>Il13ra1</b>  | 110.33 | 16.13 | 83.55  | 16.77  | 100.12 | 16.26 | 114.20 | 13.21  |
| <b>Il15</b>     | 70.36  | 13.95 | 57.98  | 12.20  | 79.04  | 11.91 | 107.29 | 16.58  |
| <b>Il16</b>     | 20.19  | 2.98  | 15.80  | 3.48   | 19.77  | 3.74  | 22.84  | 2.60   |
| <b>Il17b</b>    | 1.68   | 0.43  | 1.18   | 0.43   | 1.65   | 0.51  | 7.88   | 5.83   |
| <b>Il18</b>     | 14.21  | 1.77  | 8.91   | 1.77   | 13.74  | 4.40  | 24.53  | 9.15   |
| <b>Il1a</b>     | 2.03   | 0.46  | 4.43   | 3.35   | 1.76   | 0.45  | 5.82   | 3.23   |
| <b>Il1b</b>     | 10.48  | 3.42  | 4.99   | 1.37   | 7.87   | 1.76  | 12.15  | 4.05   |
| <b>Il1f6</b>    | 3.33   | 1.95  | 6.07   | 4.77   | 1.77   | 0.45  | 5.18   | 3.15   |
| <b>Il1f8</b>    | 1.68   | 0.43  | 1.65   | 0.63   | 1.79   | 0.45  | 5.36   | 3.33   |
| <b>Il1r1</b>    | 121.85 | 22.58 | 93.12  | 22.28  | 112.62 | 30.98 | 145.41 | 29.81  |
| <b>Il1r2</b>    | 3.70   | 0.94  | 4.41   | 1.64   | 18.44  | 13.41 | 11.70  | 6.50   |
| <b>Il20</b>     | 2.29   | 1.01  | 0.90   | 0.24   | 1.64   | 0.51  | 5.24   | 3.14   |
| <b>Il2rb</b>    | 1.88   | 0.37  | 2.38   | 0.72   | 2.48   | 0.74  | 5.89   | 3.01   |
| <b>Il2rg</b>    | 26.35  | 3.80  | 24.28  | 4.83   | 26.00  | 2.93  | 25.92  | 3.14   |
| <b>Il3</b>      | 1.58   | 0.46  | 18.60  | 17.39  | 1.89   | 0.65  | 5.97   | 3.94   |
| <b>Il4</b>      | 1.85   | 0.45  | 10.54  | 9.26   | 1.66   | 0.50  | 5.31   | 3.28   |
| <b>Il5ra</b>    | 1.59   | 0.45  | 1.03   | 0.18   | 1.72   | 0.47  | 12.57  | 10.40  |
| <b>Il6ra</b>    | 82.38  | 29.89 | 50.37  | 15.86  | 146.10 | 58.58 | 102.69 | 39.30  |
| <b>Il6st</b>    | 598.26 | 41.25 | 445.39 | 102.23 | 536.13 | 64.91 | 442.47 | 88.66  |
| <b>Il8rb</b>    | 1.64   | 0.48  | 2.58   | 1.20   | 1.66   | 0.50  | 10.00  | 7.95   |
| <b>Itgam</b>    | 101.52 | 25.41 | 110.03 | 30.16  | 88.03  | 22.51 | 137.64 | 40.74  |
| <b>Itgb2</b>    | 56.23  | 10.96 | 38.11  | 9.47   | 47.85  | 9.48  | 72.63  | 14.96  |
| <b>Lta</b>      | 1.51   | 0.49  | 2.12   | 1.17   | 1.73   | 0.48  | 5.18   | 3.15   |
| <b>Ltb</b>      | 4.02   | 1.75  | 4.14   | 1.64   | 4.43   | 0.65  | 17.52  | 9.28   |
| <b>Mif</b>      | 625.90 | 67.43 | 551.73 | 108.60 | 659.46 | 74.89 | 547.48 | 51.26  |
| <b>Scye1</b>    | 265.06 | 24.01 | 227.30 | 34.12  | 282.30 | 20.48 | 289.52 | 31.86  |
| <b>Spp1</b>     | 166.43 | 37.92 | 151.72 | 44.61  | 200.52 | 66.30 | 205.46 | 70.37  |
| <b>Tgfb1</b>    | 212.89 | 23.83 | 188.36 | 39.99  | 249.09 | 38.44 | 329.83 | 73.87  |
| <b>Tnf</b>      | 2.74   | 0.39  | 1.89   | 0.32   | 2.27   | 0.34  | 6.76   | 3.29   |
| <b>Tnfrsf1a</b> | 54.14  | 8.73  | 65.46  | 11.46  | 55.99  | 10.16 | 174.32 | 124.61 |
| <b>Tnfrsf1b</b> | 74.25  | 4.96  | 60.52  | 11.67  | 72.01  | 12.91 | 77.35  | 20.54  |
| <b>Cd40lg</b>   | 1.77   | 0.57  | 1.91   | 0.60   | 1.69   | 0.49  | 5.23   | 3.14   |
| <b>Tollip</b>   | 67.80  | 7.08  | 62.10  | 10.43  | 75.28  | 6.31  | 94.41  | 12.36  |
| <b>Xcr1</b>     | 1.64   | 0.44  | 6.26   | 4.58   | 2.06   | 0.37  | 9.40   | 7.19   |

Values are reported as  $2^{-\Delta\Delta C_T}$  x 1000. n=6/group. \* p<0.05 vs. day 0; † p<0.05 vs. saline; ‡ p<0.05 vs. Aliskiren; § p<0.05 vs. Valsartan



**Supplemental Table 4. Inflammatory gene results for MMP-9 null remote (LVC) and infarct (LVI).**

| Gene          | LVC        |       |             |       |                |       |                |        |          |       |
|---------------|------------|-------|-------------|-------|----------------|-------|----------------|--------|----------|-------|
|               | Null Day 0 |       | Null Saline |       | Null Aliskiren |       | Null Valsartan |        | Null A+V |       |
|               | AVG        | SEM   | AVG         | SEM   | AVG            | SEM   | AVG            | SEM    | AVG      | SEM   |
| <b>Abcf1</b>  | 183.34     | 8.77  | 322.74      | 34.06 | 300.38         | 24.10 | 306.77         | 55.76  | 271.70   | 35.87 |
| <b>Bcl6</b>   | 45.97      | 8.73  | 40.43       | 3.82  | 57.70          | 7.69  | 71.53          | 22.29  | 47.86    | 4.13  |
| <b>Cxcr5</b>  | 0.61       | 0.16  | 0.80        | 0.13  | 1.35           | 0.34  | 1.45           | 0.46   | 0.95     | 0.19  |
| <b>C3</b>     | 341.27     | 47.94 | 398.66      | 56.87 | 389.12         | 53.16 | 479.44         | 136.16 | 346.62   | 31.29 |
| <b>Casp1</b>  | 19.54      | 2.17  | 35.74*      | 3.18  | 30.83          | 4.53  | 36.92*         | 4.46   | 30.29    | 4.51  |
| <b>Ccl1</b>   | 0.32       | 0.03  | 0.37        | 0.07  | 0.40           | 0.08  | 0.88           | 0.50   | 0.42     | 0.09  |
| <b>Ccl11</b>  | 11.05      | 2.38  | 2.11*       | 0.42  | 1.62*          | 0.31  | 2.80*          | 1.01   | 2.95*    | 1.26  |
| <b>Ccl12</b>  | 17.58      | 3.30  | 28.37       | 3.68  | 18.42          | 2.80  | 19.41          | 3.24   | 24.66    | 5.57  |
| <b>Ccl17</b>  | 0.46       | 0.07  | 1.48        | 0.32  | 1.01           | 0.15  | 1.44           | 0.41   | 0.98     | 0.15  |
| <b>Ccl19</b>  | 21.96      | 1.04  | 72.96*      | 14.15 | 72.79*         | 11.27 | 73.29*         | 12.25  | 78.04*   | 13.62 |
| <b>Ccl2</b>   | 31.09      | 3.48  | 30.84       | 3.77  | 26.78          | 1.87  | 43.03          | 14.67  | 33.32    | 6.33  |
| <b>Ccl20</b>  | 0.18       | 0.02  | 0.36        | 0.07  | 0.38           | 0.08  | 0.86           | 0.51   | 0.35     | 0.09  |
| <b>Ccl22</b>  | 0.56       | 0.14  | 0.49        | 0.07  | 0.70           | 0.18  | 1.21           | 0.47   | 0.70     | 0.09  |
| <b>Ccl24</b>  | 1.31       | 0.30  | 0.55        | 0.07  | 0.57           | 0.11  | 1.01           | 0.47   | 0.62     | 0.14  |
| <b>Ccl25</b>  | 2.12       | 0.45  | 3.65        | 0.71  | 3.71           | 0.42  | 3.31           | 0.44   | 3.05     | 0.60  |
| <b>Ccl3</b>   | 0.68       | 0.17  | 0.93        | 0.15  | 1.34           | 0.52  | 1.59           | 0.66   | 1.06     | 0.21  |
| <b>Ccl4</b>   | 3.21       | 0.63  | 4.60        | 0.88  | 4.84           | 1.89  | 5.54           | 1.66   | 4.04     | 0.87  |
| <b>Ccl5</b>   | 8.60       | 0.97  | 9.66        | 1.46  | 11.46          | 1.96  | 10.58          | 1.39   | 10.06    | 2.02  |
| <b>Ccl6</b>   | 6.63       | 0.81  | 5.44        | 1.10  | 5.99           | 0.61  | 6.52           | 2.34   | 6.29     | 1.19  |
| <b>Ccl7</b>   | 29.75      | 4.52  | 15.78*      | 2.51  | 13.06*         | 1.33  | 13.24*         | 2.66   | 15.96*   | 4.12  |
| <b>Ccl8</b>   | 9.00       | 1.22  | 25.62*      | 4.46  | 19.00          | 3.26  | 18.77          | 4.39   | 26.16*   | 3.65  |
| <b>Ccl9</b>   | 11.29      | 1.06  | 22.93*      | 2.63  | 20.69*         | 2.36  | 25.49*         | 4.01   | 23.05*   | 2.82  |
| <b>Ccr1</b>   | 4.02       | 0.37  | 7.68        | 0.82  | 5.82           | 1.56  | 8.02           | 1.14   | 6.44     | 0.99  |
| <b>Ccr2</b>   | 10.42      | 1.53  | 13.72       | 1.26  | 11.00          | 1.26  | 12.60          | 2.79   | 12.15    | 1.19  |
| <b>Ccr3</b>   | 14.60      | 1.12  | 14.45       | 1.74  | 15.28          | 2.71  | 13.65          | 2.02   | 14.49    | 1.72  |
| <b>Ccr4</b>   | 0.52       | 0.14  | 0.59        | 0.12  | 0.87           | 0.32  | 1.46           | 0.60   | 0.95     | 0.45  |
| <b>Ccr5</b>   | 12.91      | 1.96  | 24.53       | 1.56  | 22.83          | 4.90  | 24.47          | 3.72   | 21.32    | 1.74  |
| <b>Ccr6</b>   | 0.58       | 0.17  | 0.67        | 0.15  | 0.76           | 0.16  | 1.06           | 0.50   | 0.84     | 0.21  |
| <b>Ccr7</b>   | 1.56       | 0.25  | 1.74        | 0.14  | 2.33           | 0.59  | 2.70           | 0.82   | 1.70     | 0.28  |
| <b>Ccr8</b>   | 0.28       | 0.06  | 0.36        | 0.07  | 0.38           | 0.08  | 0.89           | 0.50   | 0.48     | 0.09  |
| <b>Ccr9</b>   | 5.23       | 0.41  | 4.56        | 0.58  | 4.24           | 1.22  | 4.11           | 0.44   | 3.26     | 0.32  |
| <b>Crp</b>    | 0.53       | 0.30  | 0.36        | 0.07  | 0.38           | 0.08  | 0.86           | 0.51   | 0.35     | 0.09  |
| <b>Cx3cl1</b> | 42.67      | 1.44  | 104.42*     | 14.86 | 108.50*        | 15.90 | 86.27          | 14.07  | 89.69    | 18.67 |
| <b>Cxcl1</b>  | 2.21       | 0.50  | 2.43        | 0.33  | 1.69           | 0.27  | 2.18           | 0.45   | 1.88     | 0.35  |
| <b>Cxcl10</b> | 7.54       | 0.87  | 10.89       | 2.13  | 12.11          | 2.73  | 8.18           | 1.69   | 9.88     | 2.68  |
| <b>Cxcl11</b> | 0.57       | 0.12  | 0.88        | 0.30  | 1.23           | 0.24  | 1.82           | 0.96   | 0.84     | 0.16  |
| <b>Cxcl12</b> | 500.62     | 21.68 | 353.54      | 22.02 | 333.26         | 22.16 | 469.32         | 79.60  | 437.99   | 41.00 |
| <b>Cxcl13</b> | 0.65       | 0.10  | 1.89        | 0.28  | 2.19           | 0.64  | 3.29           | 1.61   | 2.56     | 0.73  |
| <b>Cxcl15</b> | 0.17       | 0.01  | 0.36        | 0.07  | 0.38           | 0.08  | 0.86           | 0.51   | 0.35     | 0.09  |
| <b>Pf4</b>    | 77.94      | 4.83  | 37.94*      | 3.48  | 39.28*         | 2.47  | 48.95*         | 6.78   | 48.79*   | 6.05  |
| <b>Cxcl5</b>  | 2.05       | 0.43  | 2.18        | 1.03  | 1.73           | 0.30  | 1.99           | 0.43   | 1.33     | 0.37  |
| <b>Cxcl9</b>  | 21.97      | 2.42  | 9.14*       | 1.81  | 9.05*          | 1.90  | 9.66*          | 2.64   | 11.58*   | 2.60  |
| <b>Cxcr3</b>  | 0.93       | 0.17  | 1.25        | 0.23  | 2.03           | 0.81  | 1.57           | 0.48   | 1.37     | 0.25  |
| <b>Ccr10</b>  | 7.04       | 0.45  | 9.49        | 1.28  | 10.74          | 2.33  | 10.85          | 1.51   | 9.37     | 1.02  |

|                 |        |       |         |       |        |       |        |       |        |       |
|-----------------|--------|-------|---------|-------|--------|-------|--------|-------|--------|-------|
| <b>Ifng</b>     | 0.21   | 0.03  | 0.44    | 0.09  | 0.41   | 0.07  | 0.86   | 0.51  | 0.50   | 0.10  |
| <b>Il10</b>     | 0.61   | 0.10  | 0.91    | 0.21  | 0.96   | 0.15  | 1.32   | 0.42  | 0.71   | 0.13  |
| <b>Il10ra</b>   | 7.17   | 1.33  | 6.84    | 0.83  | 9.17   | 0.90  | 8.74   | 1.41  | 7.24   | 1.11  |
| <b>Il10rb</b>   | 347.45 | 13.52 | 369.54  | 42.95 | 316.11 | 31.04 | 335.66 | 29.86 | 337.44 | 26.91 |
| <b>Il11</b>     | 0.21   | 0.02  | 0.76    | 0.08  | 0.98   | 0.27  | 1.29   | 0.45  | 0.81   | 0.17  |
| <b>Il13</b>     | 0.23   | 0.05  | 0.43    | 0.12  | 0.46   | 0.12  | 0.88   | 0.50  | 0.35   | 0.09  |
| <b>Il13ra1</b>  | 71.65  | 3.70  | 84.66   | 6.69  | 78.09  | 3.85  | 88.69  | 12.91 | 71.90  | 4.15  |
| <b>Il15</b>     | 116.87 | 6.69  | 85.99*  | 8.59  | 81.05* | 9.48  | 98.79* | 7.96  | 80.21* | 6.87  |
| <b>Il16</b>     | 11.27  | 0.64  | 11.16   | 0.95  | 12.03  | 1.34  | 13.38  | 1.89  | 11.37  | 1.22  |
| <b>Il17b</b>    | 0.25   | 0.03  | 0.36    | 0.07  | 0.50   | 0.16  | 0.95   | 0.50  | 0.36   | 0.09  |
| <b>Il18</b>     | 2.76   | 0.24  | 4.96    | 0.72  | 4.71   | 0.60  | 4.20   | 0.64  | 3.92   | 0.38  |
| <b>Il1a</b>     | 0.41   | 0.12  | 0.69    | 0.15  | 0.92   | 0.32  | 1.79   | 1.06  | 0.52   | 0.12  |
| <b>Il1b</b>     | 3.15   | 0.52  | 5.36    | 0.63  | 5.58   | 1.92  | 5.11   | 1.64  | 2.81   | 0.54  |
| <b>Il1f6</b>    | 0.30   | 0.07  | 0.36    | 0.07  | 0.38   | 0.08  | 0.86   | 0.51  | 0.38   | 0.08  |
| <b>Il1f8</b>    | 0.31   | 0.07  | 0.37    | 0.07  | 0.38   | 0.08  | 2.15   | 1.77  | 0.35   | 0.09  |
| <b>Il1r1</b>    | 25.58  | 1.91  | 48.32   | 3.49  | 53.49  | 10.19 | 56.47  | 7.04  | 50.08  | 10.34 |
| <b>Il1r2</b>    | 0.65   | 0.13  | 2.65    | 0.87  | 2.25   | 0.35  | 3.96   | 1.35  | 2.00   | 0.72  |
| <b>Il20</b>     | 0.17   | 0.01  | 0.36    | 0.07  | 0.38   | 0.08  | 0.86   | 0.51  | 0.35   | 0.09  |
| <b>Il2rb</b>    | 1.54   | 0.27  | 1.12    | 0.26  | 1.31   | 0.16  | 1.48   | 0.48  | 1.14   | 0.21  |
| <b>Il2rg</b>    | 40.66  | 3.05  | 31.22   | 2.21  | 30.37  | 3.06  | 33.97  | 0.77  | 33.52  | 2.20  |
| <b>Il3</b>      | 0.17   | 0.01  | 0.36    | 0.07  | 0.38   | 0.08  | 0.86   | 0.51  | 0.35   | 0.09  |
| <b>Il4</b>      | 0.31   | 0.04  | 0.43    | 0.06  | 0.43   | 0.08  | 1.00   | 0.49  | 0.49   | 0.11  |
| <b>Il5ra</b>    | 0.20   | 0.03  | 0.38    | 0.07  | 0.38   | 0.08  | 0.86   | 0.51  | 0.35   | 0.09  |
| <b>Il6ra</b>    | 23.72  | 2.42  | 26.33   | 2.32  | 42.29  | 12.07 | 41.39  | 8.10  | 30.93  | 4.31  |
| <b>Il6st</b>    | 341.68 | 19.15 | 362.57  | 12.77 | 406.02 | 35.47 | 350.10 | 15.35 | 354.34 | 14.49 |
| <b>Il8rb</b>    | 0.53   | 0.14  | 1.45    | 0.39  | 0.79   | 0.13  | 1.45   | 0.57  | 0.75   | 0.19  |
| <b>Itgam</b>    | 18.58  | 0.83  | 33.56   | 2.44  | 42.84  | 10.70 | 36.05  | 5.36  | 34.77  | 3.92  |
| <b>Itgb2</b>    | 16.34  | 0.83  | 27.27   | 2.82  | 27.50  | 5.11  | 21.97  | 2.46  | 24.06  | 2.90  |
| <b>Lta</b>      | 0.18   | 0.01  | 0.41    | 0.07  | 0.38   | 0.08  | 0.88   | 0.50  | 0.35   | 0.09  |
| <b>Ltb</b>      | 2.56   | 0.26  | 1.61    | 0.29  | 3.38   | 0.74  | 2.97   | 0.65  | 2.23   | 0.35  |
| <b>Mif</b>      | 442.81 | 42.44 | 760.12* | 84.07 | 673.17 | 61.03 | 541.87 | 74.19 | 630.02 | 25.28 |
| <b>Scye1</b>    | 344.94 | 25.10 | 348.41  | 31.54 | 312.34 | 19.32 | 262.25 | 25.58 | 294.21 | 15.60 |
| <b>Spp1</b>     | 1.18   | 0.30  | 44.97   | 14.61 | 46.37  | 18.39 | 37.74  | 10.92 | 30.73  | 8.02  |
| <b>Tgfb1</b>    | 111.00 | 6.50  | 110.04  | 8.62  | 138.95 | 13.35 | 222.58 | 83.14 | 115.12 | 11.34 |
| <b>Tnf</b>      | 3.47   | 0.94  | 1.63    | 0.24  | 1.72   | 0.26  | 2.26   | 0.35  | 1.59   | 0.33  |
| <b>Tnfrsf1a</b> | 38.00  | 4.24  | 38.76   | 3.01  | 44.33  | 3.87  | 47.68  | 6.27  | 40.89  | 3.22  |
| <b>Tnfrsf1b</b> | 16.87  | 1.26  | 30.57*  | 2.05  | 32.70* | 6.14  | 34.28* | 3.26  | 27.87  | 3.59  |
| <b>Cd40lg</b>   | 0.25   | 0.04  | 0.37    | 0.07  | 0.50   | 0.11  | 0.90   | 0.50  | 0.49   | 0.10  |
| <b>Tollip</b>   | 76.95  | 3.78  | 78.52   | 3.95  | 78.97  | 3.51  | 84.65  | 11.62 | 80.92  | 6.31  |
| <b>Xcr1</b>     | 0.51   | 0.08  | 0.48    | 0.08  | 0.59   | 0.06  | 0.90   | 0.50  | 0.49   | 0.07  |

LVI

|        | Null Saline |        | Null Aliskiren |        | Null Valsartan |        | Null A+V |        |
|--------|-------------|--------|----------------|--------|----------------|--------|----------|--------|
|        | AVG         | SEM    | AVG            | SEM    | AVG            | SEM    | AVG      | SEM    |
| Abcf1  | 379.91      | 53.51  | 383.47         | 87.53  | 320.49         | 40.24  | 356.19   | 49.66  |
| Bcl6   | 174.09      | 55.13  | 111.15         | 28.36  | 165.35         | 60.29  | 137.82   | 30.42  |
| Cxcr5  | 7.27        | 2.08   | 8.12           | 5.08   | 5.27           | 1.96   | 3.83     | 1.03   |
| C3     | 1394.26     | 400.03 | 824.85         | 205.23 | 689.45         | 144.75 | 941.69   | 183.27 |
| Casp1  | 137.14      | 39.23  | 114.84         | 62.13  | 83.94          | 26.98  | 104.87   | 33.91  |
| Ccl1   | 5.49        | 2.21   | 6.82           | 5.15   | 4.28           | 2.03   | 2.76     | 0.90   |
| Ccl11  | 6.75        | 2.22   | 7.30           | 5.07   | 4.54           | 1.96   | 2.76     | 0.89   |
| Ccl12  | 37.32       | 8.42   | 25.23          | 7.30   | 26.04          | 8.07   | 31.20    | 11.36  |
| Ccl17  | 6.01        | 2.10   | 8.70           | 5.03   | 4.71           | 2.00   | 3.81     | 0.81   |
| Ccl19  | 162.67      | 31.13  | 137.44         | 42.57  | 158.96         | 37.73  | 163.41   | 34.12  |
| Ccl2   | 56.37       | 17.88  | 29.45          | 4.83   | 45.16          | 10.66  | 40.99    | 14.04  |
| Ccl20  | 5.46        | 2.22   | 6.81           | 5.15   | 4.25           | 2.04   | 2.65     | 0.93   |
| Ccl22  | 5.60        | 2.17   | 6.99           | 5.12   | 4.71           | 2.04   | 2.88     | 0.85   |
| Ccl24  | 5.46        | 2.22   | 6.92           | 5.13   | 4.26           | 2.04   | 2.75     | 0.90   |
| Ccl25  | 8.87        | 1.79   | 8.68           | 4.87   | 6.54           | 1.95   | 4.98     | 0.86   |
| Ccl3   | 7.55        | 1.95   | 7.11           | 5.10   | 5.87           | 2.50   | 5.98     | 2.33   |
| Ccl4   | 38.82       | 15.82  | 14.20          | 5.90   | 23.42          | 10.53  | 29.44    | 12.78  |
| Ccl5   | 27.24       | 7.94   | 23.25          | 4.57   | 23.38          | 6.64   | 32.34    | 11.39  |
| Ccl6   | 10.73       | 4.92   | 10.02          | 4.63   | 8.55           | 2.62   | 7.92     | 1.90   |
| Ccl7   | 28.21       | 6.92   | 20.72          | 7.82   | 32.98          | 7.34   | 36.32    | 9.56   |
| Ccl8   | 29.68       | 7.82   | 24.68          | 8.34   | 17.05          | 5.04   | 26.22    | 7.81   |
| Ccl9   | 54.64       | 15.04  | 36.50          | 10.04  | 41.33          | 11.32  | 42.19    | 7.34   |
| Ccr1   | 11.87       | 2.64   | 10.53          | 4.62   | 9.24           | 1.93   | 9.16     | 2.30   |
| Ccr2   | 14.70       | 2.92   | 13.48          | 4.05   | 8.50           | 2.15   | 13.15    | 2.29   |
| Ccr3   | 22.43       | 2.35   | 16.18          | 4.06   | 12.05          | 4.09   | 18.02    | 4.40   |
| Ccr4   | 6.17        | 2.29   | 9.75           | 5.31   | 4.27           | 2.04   | 3.12     | 0.90   |
| Ccr5   | 42.52       | 5.16   | 27.82          | 6.84   | 29.20          | 6.54   | 36.16    | 8.25   |
| Ccr6   | 6.72        | 1.98   | 8.09           | 4.97   | 4.38           | 2.01   | 5.02     | 1.58   |
| Ccr7   | 9.45        | 4.06   | 9.91           | 5.75   | 4.60           | 1.96   | 6.36     | 1.70   |
| Ccr8   | 6.24        | 2.18   | 6.82           | 5.15   | 4.25           | 2.04   | 2.68     | 0.92   |
| Ccr9   | 6.31        | 2.02   | 8.51           | 4.88   | 5.70           | 1.77   | 6.68     | 2.57   |
| Crp    | 6.67        | 3.20   | 6.81           | 5.15   | 4.34           | 2.04   | 2.65     | 0.93   |
| Cx3cl1 | 226.39      | 28.34  | 200.06         | 53.87  | 169.87         | 26.01  | 293.13   | 60.15  |
| Cxcl1  | 5.81        | 2.13   | 7.52           | 5.02   | 4.77           | 1.91   | 3.20     | 0.79   |
| Cxcl10 | 30.11       | 13.93  | 12.60          | 4.45   | 36.38          | 19.82  | 41.62    | 19.29  |
| Cxcl11 | 7.01        | 2.48   | 6.99           | 5.12   | 7.51           | 3.23   | 2.96     | 0.89   |
| Cxcl12 | 511.55      | 111.74 | 550.05         | 125.36 | 537.64         | 116.51 | 337.57   | 42.45  |
| Cxcl13 | 10.57       | 3.31   | 8.97           | 4.85   | 8.03           | 2.40   | 14.70    | 7.97   |
| Cxcl15 | 5.93        | 2.49   | 6.81           | 5.15   | 4.25           | 2.04   | 2.65     | 0.93   |
| Pf4    | 79.14       | 14.55  | 46.32          | 13.34  | 49.82          | 7.55   | 44.76    | 6.82   |
| Cxcl5  | 12.30       | 4.72   | 9.90           | 4.80   | 9.77           | 4.42   | 5.77     | 0.99   |
| Cxcl9  | 6.63        | 2.25   | 10.36          | 4.66   | 8.30           | 1.79   | 6.35     | 0.93   |
| Cxcr3  | 5.94        | 2.09   | 7.50           | 5.03   | 4.99           | 1.95   | 9.49     | 3.20   |
| Ccr10  | 22.96       | 8.74   | 13.58          | 4.93   | 20.27          | 8.70   | 15.01    | 3.17   |
| lfng   | 7.25        | 3.15   | 6.81           | 5.15   | 5.63           | 2.45   | 2.69     | 0.91   |

|                 |        |        |        |        |        |        |        |        |
|-----------------|--------|--------|--------|--------|--------|--------|--------|--------|
| <b>Il10</b>     | 8.30   | 4.17   | 7.09   | 5.10   | 4.57   | 1.98   | 3.74   | 1.20   |
| <b>Il10ra</b>   | 15.31  | 1.91   | 14.03  | 4.63   | 12.04  | 2.32   | 17.51  | 5.57   |
| <b>Il10rb</b>   | 263.39 | 25.90  | 296.17 | 39.42  | 233.19 | 34.12  | 249.41 | 22.72  |
| <b>Il11</b>     | 5.68   | 2.18   | 7.33   | 5.05   | 4.37   | 2.01   | 3.26   | 0.93   |
| <b>Il13</b>     | 5.46   | 2.22   | 6.85   | 5.15   | 4.25   | 2.04   | 2.72   | 0.92   |
| <b>Il13ra1</b>  | 103.90 | 9.86   | 99.81  | 19.86  | 102.79 | 15.42  | 110.05 | 15.80  |
| <b>Il15</b>     | 109.26 | 40.25  | 81.89  | 12.61  | 117.86 | 38.41  | 85.43  | 15.99  |
| <b>Il16</b>     | 14.41  | 2.53   | 18.09  | 3.71   | 17.44  | 3.79   | 19.20  | 2.49   |
| <b>Il17b</b>    | 5.49   | 2.21   | 6.84   | 5.15   | 4.25   | 2.04   | 2.65   | 0.93   |
| <b>Il18</b>     | 28.47  | 9.91   | 10.52  | 4.62   | 11.21  | 4.39   | 14.47  | 3.35   |
| <b>Il1a</b>     | 5.66   | 2.16   | 6.87   | 5.14   | 4.52   | 1.99   | 2.74   | 0.90   |
| <b>Il1b</b>     | 9.03   | 2.05   | 12.90  | 5.06   | 7.47   | 1.75   | 7.96   | 2.34   |
| <b>Il1f6</b>    | 9.61   | 5.70   | 6.82   | 5.15   | 4.25   | 2.04   | 2.68   | 0.92   |
| <b>Il1f8</b>    | 5.46   | 2.22   | 6.81   | 5.15   | 5.17   | 2.94   | 2.70   | 0.91   |
| <b>Il1r1</b>    | 148.98 | 23.42  | 103.90 | 16.81  | 97.48  | 14.31  | 160.04 | 40.03  |
| <b>Il1r2</b>    | 16.25  | 4.99   | 14.80  | 10.57  | 9.66   | 3.73   | 6.78   | 1.82   |
| <b>Il20</b>     | 6.29   | 2.77   | 6.81   | 5.15   | 4.25   | 2.04   | 2.65   | 0.93   |
| <b>Il2rb</b>    | 5.67   | 2.16   | 7.51   | 5.02   | 4.25   | 2.04   | 3.03   | 0.81   |
| <b>Il2rg</b>    | 26.50  | 6.16   | 27.71  | 2.42   | 29.29  | 3.96   | 35.15  | 3.98   |
| <b>Il3</b>      | 5.46   | 2.22   | 6.81   | 5.15   | 4.49   | 2.05   | 2.66   | 0.93   |
| <b>Il4</b>      | 5.56   | 2.19   | 6.81   | 5.15   | 4.29   | 2.03   | 2.74   | 0.89   |
| <b>Il5ra</b>    | 5.46   | 2.22   | 6.81   | 5.15   | 5.49   | 3.25   | 2.65   | 0.93   |
| <b>Il6ra</b>    | 80.89  | 25.05  | 52.51  | 9.79   | 68.71  | 14.02  | 146.40 | 60.66  |
| <b>Il6st</b>    | 491.02 | 42.32  | 428.47 | 78.50  | 410.25 | 32.09  | 485.25 | 66.81  |
| <b>Il8rb</b>    | 5.66   | 2.16   | 7.34   | 5.06   | 4.55   | 1.97   | 2.73   | 0.90   |
| <b>Itgam</b>    | 114.52 | 12.31  | 66.72  | 15.51  | 95.84  | 26.86  | 99.78  | 18.90  |
| <b>Itgb2</b>    | 54.61  | 9.15   | 52.90  | 13.72  | 49.22  | 14.58  | 70.66  | 13.56  |
| <b>Lta</b>      | 5.46   | 2.22   | 6.81   | 5.15   | 4.25   | 2.04   | 2.66   | 0.93   |
| <b>Ltb</b>      | 10.18  | 3.46   | 11.28  | 4.63   | 8.89   | 4.11   | 7.03   | 1.55   |
| <b>Mif</b>      | 745.71 | 127.97 | 690.57 | 157.22 | 705.07 | 149.60 | 705.33 | 168.12 |
| <b>Scye1</b>    | 309.61 | 36.97  | 296.45 | 53.42  | 252.33 | 31.71  | 258.57 | 20.17  |
| <b>Spp1</b>     | 190.10 | 54.30  | 118.90 | 46.01  | 114.30 | 28.80  | 203.60 | 44.34  |
| <b>Tgfb1</b>    | 370.01 | 126.68 | 162.02 | 21.27  | 316.39 | 59.86  | 335.20 | 73.05  |
| <b>Tnf</b>      | 6.22   | 2.13   | 7.92   | 4.95   | 4.91   | 1.91   | 5.66   | 2.02   |
| <b>Tnfrsf1a</b> | 45.46  | 5.81   | 37.85  | 5.92   | 39.50  | 2.59   | 58.11  | 9.28   |
| <b>Tnfrsf1b</b> | 61.08  | 15.73  | 61.79  | 16.57  | 70.88  | 26.36  | 54.44  | 10.69  |
| <b>Cd40lg</b>   | 6.38   | 2.80   | 6.81   | 5.15   | 4.25   | 2.04   | 2.96   | 0.85   |
| <b>Tollip</b>   | 81.13  | 16.18  | 100.66 | 18.04  | 78.29  | 13.33  | 76.62  | 6.40   |
| <b>Xcr1</b>     | 5.52   | 2.20   | 7.10   | 5.10   | 4.27   | 0.00   | 3.46   | 0.82   |

Values are reported as  $2^{-\Delta CT} \times 1000$ . n=6/group. \* p<0.05 vs. day 0

Supplemental Table 5. Clustering list of ECM genes.

| WT      |         |         |         |         |       | Null    |         |         |         |         |        |
|---------|---------|---------|---------|---------|-------|---------|---------|---------|---------|---------|--------|
| LVC     |         |         | LVI     |         |       | LVC     |         |         | LVI     |         |        |
| A       | V       | AV      | A       | V       | AV    | A       | V       | AV      | A       | V       | AV     |
| Adamts1 | Adamts1 | Adamts1 | Adamts8 | Adamts5 | Ncam2 | Adamts8 | Hc      | Cdh3    | Cdh3    | Ctnna2  | Col2a1 |
| Adamts8 | Cdh1    | Adamts5 | Mmp9    | Ctnna2  | Syt1  | Col2a1  | Mmp12   | Mmp10   | Mmp10   | Cdh3    | Thbs1  |
| Ctnna2  | Cntn1   | Adamts8 |         | Cdh1    | Timp1 |         | Cntn1   | Mmp1a   | Mmp1a   | Hapln1  | Ctgf   |
| Cdh1    | Col2a1  | Ctnna2  |         | Cdh3    |       |         | Ncam2   | Mmp7    | Mmp7    | Mmp10   | Vcam1  |
| Cdh3    | Col4a2  | Cdh1    |         | Cdh4    |       |         | Mmp13   | Spock1  | Ncam2   | Mmp7    |        |
| Cntn1   | Ctgf    | Cdh3    |         | Cntn1   |       |         | Mmp7    | Syt1    | Spock1  | Ncam2   |        |
| Hapln1  | Hc      | Cdh4    |         | Col4a2  |       |         | Sell    | Col2a1  | Syt1    | Spock1  |        |
| Hc      | Mmp2    | Cntn1   |         | Col6a1  |       |         | Mmp8    | Ctnna2  | Ctnna2  | Syt1    |        |
| Itga5   | Spp1    | Col1a1  |         | Entpd1  |       |         | Hapln1  | Mmp12   | Hapln1  | Mmp1a   |        |
| Itgae   | Vcam1   | Col3a1  |         | Hapln1  |       |         | Lamb3   | Cntn1   | Lama1   | Lama1   |        |
| Lama1   |         | Col5a1  |         | Hc      |       |         | Cdh3    | Lama1   | Timp1   | Timp1   |        |
| Mmp10   |         | Ctgf    |         | Itgae   |       |         | Mmp10   | Hapln1  | Cdh1    | Mmp11   |        |
| Mmp12   |         | Entpd1  |         | Itgam   |       |         | Mmp1a   | Ncam2   | Mmp11   | Cdh1    |        |
| Mmp13   |         | Fbln1   |         | Itgav   |       |         | Spock1  | Timp1   | Cdh4    | Itgax   |        |
| Mmp1a   |         | Fn1     |         | Itgax   |       |         | Syt1    | Hc      | Itgb4   | Cdh4    |        |
| Mmp7    |         | Hapln1  |         | Itgb3   |       |         | Ctnna2  | Itgb3   | Cntn1   | Lama3   |        |
| Mmp8    |         | Hc      |         | Itgb4   |       |         | Lama1   | Adamts8 | Itga4   | Thbs3   |        |
| Ncam2   |         | Itgae   |         | Lama1   |       |         | Itga2   | Entpd1  | Itga2   | Itgb4   |        |
| Sele    |         | Itgb3   |         | Lamc1   |       |         | Timp1   | Sell    | Mmp12   | Itga4   |        |
| Sell    |         | Lama1   |         | Mmp10   |       |         | Itga5   | Emilin1 | Hc      | Adamts2 |        |
| Spock1  |         | Mmp10   |         | Mmp11   |       |         | Itgax   | Col6a1  | Col2a1  | Col5a1  |        |
| Spp1    |         | Mmp12   |         | Mmp12   |       |         | Lamb2   | Mmp14   | Sele    | Cntn1   |        |
| Syt1    |         | Mmp13   |         | Mmp13   |       |         | Itgae   | Itgav   | Itgal   | Lamb2   |        |
|         |         | Mmp1a   |         | Mmp1a   |       |         | Cdh1    | Adamts2 | Mmp8    | Mmp12   |        |
|         |         | Mmp2    |         | Mmp2    |       |         | Mmp15   | Col4a2  | Itga5   | Hc      |        |
|         |         | Mmp7    |         | Mmp3    |       |         | Adamts8 | Sele    | Mmp13   | Itga2   |        |
|         |         | Mmp8    |         | Mmp7    |       |         | Itga3   | Lama3   | Adamts5 | Col2a1  |        |
|         |         | Mmp9    |         | Mmp8    |       |         | Cdh4    | Timp2   | Lamb3   | Sell    |        |
|         |         | Ncam2   |         | Mmp9    |       |         | Sgce    | Itga2   | Lamb2   | Mmp14   |        |
|         |         | Postn   |         | Ncam2   |       |         | Selp    | Ecm1    | Tnc     | Sele    |        |
|         |         | Sell    |         | Pecam1  |       |         | Timp3   | Fbln1   | Itgax   | Mmp8    |        |
|         |         | Sparc   |         | Sele    |       |         | Lama3   | Pecam1  | Col4a3  | Itgal   |        |
|         |         | Spock1  |         | Sell    |       |         | Vcam1   | Col4a1  | Lamc1   | Tnc     |        |
|         |         | Syt1    |         | Selp    |       |         | Spp1    | Vtn     | Lama3   | Itgav   |        |
|         |         | Thbs1   |         | Spock1  |       |         | Col6a1  | Itgam   | Sell    | Mmp13   |        |
|         |         | Thbs2   |         | Syt1    |       |         | Col4a3  | Cdh1    | Itgae   | Selp    |        |
|         |         | Timp1   |         | Thbs3   |       |         | Fbln1   |         | Mmp2    | Itgam   |        |
|         |         | Tnc     |         | Timp1   |       |         | Pecam1  |         | Adamts2 | Itga5   |        |
|         |         | Vcam1   |         | Tnc     |       |         | Ncam1   |         | Itgb3   | Itga3   |        |
|         |         |         |         |         |       |         | Col3a1  |         | Selp    | Col1a1  |        |
|         |         |         |         |         |       |         | Col2a1  |         | Mmp14   | Mmp3    |        |
|         |         |         |         |         |       |         |         |         | Thbs3   | Timp2   |        |
|         |         |         |         |         |       |         |         |         | Col1a1  | Itgb2   |        |
|         |         |         |         |         |       |         |         |         | Mmp15   | Adamts5 |        |
|         |         |         |         |         |       |         |         |         | Thbs2   | Itgb1   |        |
|         |         |         |         |         |       |         |         |         | Itgb1   | Vtn     |        |
|         |         |         |         |         |       |         |         |         | Itga3   | Itgae   |        |
|         |         |         |         |         |       |         |         |         | Ncam1   | Spp1    |        |

**Supplemental Table 6. Clustering list of inflammatory genes.**

| WT     |        |         |        |       |          | Null     |        |        |        |          |        |
|--------|--------|---------|--------|-------|----------|----------|--------|--------|--------|----------|--------|
| LVC    |        |         | LVI    |       |          | LVC      |        |        | LVI    |          |        |
| A      | V      | A+V     | A      | V     | A+V      | A        | V      | A+V    | A      | V        | A+V    |
| Ccl1   | Ccl17  | Abcf1   | Casp1  | Il1r2 | Ccr8     | Cxcr3    | Il1f8  | Ccr4   | Ccl20  | Il5ra    | Cxcl13 |
| Ccl11  | Cxcl13 | Bcl6    | Ccl11  |       | Cxcl5    | Ccl3     | Il1a   | Cxcl13 | Il1f8  | Il1f8    | Il6ra  |
| Ccl17  | Il1r2  | Cxcr5   | Ccl24  |       | Spp1     | Ltb      | Ccl20  | Il1r2  | Il3    | Tnfrsf1b | Ccr9   |
| Ccl19  | Spp1   | C3      | Ccl3   |       | Tnfrsf1a | Spp1     | Crp    | Ccr6   | Il5ra  | Ltb      | Il1r1  |
| Ccl20  | Xcr1   | Casp1   | Ccl4   |       |          | Ccl4     | Cxcl15 | Crp    | Lta    | Ccl20    | Ccl7   |
| Ccl25  |        | Ccl1    | Ccl5   |       |          | Il6ra    | Il1f6  | Cxcl15 | Il13   | Il13     | Spp1   |
| Ccl6   |        | Ccl17   | Ccl8   |       |          | Cxcr5    | Il20   | Il20   | Ccl24  | Lta      |        |
| Ccl9   |        | Ccl19   | Ccr1   |       |          | Ccr7     | Il3    | Il3    | Ccl1   | Il3      |        |
| Ccr4   |        | Ccl2    | Ccr2   |       |          | Il1a     | Ccl1   | Ccl20  | Il17b  | Ccl24    |        |
| Ccr8   |        | Ccl20   | Ccr4   |       |          | Itgam    | Ccr8   | Il17b  | Il4    | Il17b    |        |
| Ccr9   |        | Ccl22   | Ccr6   |       |          | Il11     | Il17b  | Il1f8  | Xcr1   | Ccl1     |        |
| Crp    |        | Ccl24   | Ccr9   |       |          | Ccl22    | Cd40lg | Il5ra  | Ccl22  | Xcr1     |        |
| Cxcl11 |        | Ccl25   | Cxcl15 |       |          | Il17b    | Il5ra  | Il1f6  | Il1a   | Ccr10    |        |
| Cxcl13 |        | Ccl3    | Cxcl5  |       |          | Ccr9     | Lta    | Lta    | Il8rb  | Il4      |        |
| Cxcl15 |        | Ccl4    | Ccr10  |       |          | Il13     | Il13   | Il1r1  | Il11   | Ccl22    |        |
| Ifng   |        | Ccl5    | Il10   |       |          | Cxcl11   | Ifng   | Ccl1   | Il2rb  | Il2rb    |        |
| Il13   |        | Ccl6    | Il13   |       |          | Ccl1     | Il4    | Il13   | Cxcl15 | Il11     |        |
| Il17b  |        | Ccl9    | Il1a   |       |          | Ccl20    | Cxcl11 | Ccr8   | Cxcl1  | Il1a     |        |
| Il1a   |        | Ccr1    | Il1f6  |       |          | Crp      | Xcr1   | Il4    | Cxcr3  | Cxcl15   |        |
| Il1f6  |        | Ccr7    | Il1f8  |       |          | Cxcl15   | Ccr4   | Ifng   | Ccr8   | Il8rb    |        |
| Il1f8  |        | Ccr8    | Il3    |       |          | Il1f6    | Ccl22  | Ccl25  | Ccl17  | Bcl6     |        |
| Il1r2  |        | Ccr9    | Il4    |       |          | Il20     | Ccl24  | Ccl19  | Il20   | Il15     |        |
| Il20   |        | Crp     | Il8rb  |       |          | Il3      | Tgfb1  | Cxcl9  | Cd40lg | Ccl17    |        |
| Il3    |        | Cx3cl1  | Itgam  |       |          | Cxcl10   | Ccr6   | Cd40lg | Tnf    | Ccr4     |        |
| Il4    |        | Cxcl1   | Lta    |       |          | Ccr8     | Ccl3   | Ccl6   | Crp    | Cxcr3    |        |
| Il5ra  |        | Cxcl11  | Cd40lg |       |          | Tnfrsf1b | Il11   | Ccl7   | Ccr9   | Ccr8     |        |
| Il8rb  |        | Cxcl12  | Xcr1   |       |          | Il1f8    | Bcl6   | Xcr1   | Ccr4   | Cxcl1    |        |
| Lta    |        | Cxcl13  |        |       |          | Il5ra    | Cxcr5  | Casp1  | Ccl11  | Cxcl5    |        |
| Ltb    |        | Cxcl15  |        |       |          | Il1r1    | Ccl2   |        | Ccr6   | Il20     |        |
| Spp1   |        | Pf4     |        |       |          | Bcl6     | Ccr7   |        | Cxcl11 | Cd40lg   |        |
| Cd40lg |        | Cxcl9   |        |       |          | Lta      | Il10   |        | Ifng   | Crp      |        |
| Xcr1   |        | Cxcr3   |        |       |          | Ccr5     | Il1r2  |        | Cxcr5  | Tnf      |        |
|        |        | Ccr10   |        |       |          | Ccr3     | Ltb    |        | Ccl3   | Ccr6     |        |
|        |        | Ifng    |        |       |          | Itgb2    | Il2rb  |        | Cxcl9  | Ccl11    |        |
|        |        | Il10    |        |       |          | Ccl5     | Ccl4   |        | Il1r2  | Ifng     |        |
|        |        | Il10ra  |        |       |          | Ccr1     | C3     |        | Il10   | Cxcl11   |        |
|        |        | Il10rb  |        |       |          | Ccr10    | Cxcr3  |        | Ccr7   | Ccl3     |        |
|        |        | Il11    |        |       |          | Il1b     | Ccl17  |        | Ccl25  | Ccr9     |        |
|        |        | Il13    |        |       |          | Il4      | Il8rb  |        | Il1f6  | Cxcr5    |        |
|        |        | Il13ra1 |        |       |          | Ifng     | Ccl11  |        | Il1b   | Ccl4     |        |
|        |        | Il15    |        |       |          | Tnf      | Cxcl12 |        | Casp1  | Itgb2    |        |
|        |        | Il16    |        |       |          | Tgfb1    | Cxcl9  |        | Cxcl13 | Il16     |        |

|          |        |          |          |        |
|----------|--------|----------|----------|--------|
| Il17b    | Cd40lg | Abcf1    | Ltb      | Il10   |
| Il18     |        | Il1b     | Ccl6     | Ccl6   |
| Il1a     |        | Tnf      | Cxcl5    | Ccl5   |
| Il1b     |        | Spp1     | Ccr1     | Il1f6  |
| Il1f6    |        | Ccl9     | Ccr2     | Ccr7   |
| Il1f8    |        | Il6ra    | Ccl8     | Itgam  |
| Il1r1    |        | Il13ra1  | Tnfrsf1b | Ccl9   |
| Il1r2    |        | Il16     | Il10ra   | Casp1  |
| Il20     |        | Tnfrsf1a | Il16     | Ccl25  |
| Il2rb    |        | Ccr2     | Cxcl12   | Cxcl9  |
| Il2rg    |        | Tollip   | Tollip   | Ccl19  |
| Il3      |        | Pf4      | Ccr10    | Ccl7   |
| Il4      |        | Cxcl5    | Il13ra1  | Cxcl13 |
| Il5ra    |        | Ccr3     | Itgb2    | Ccl2   |
| Il6ra    |        | Ccr5     | Ccl9     | Il1b   |
| Il6st    |        | Ccl5     | Ccr3     | Tgfb1  |
| Il8rb    |        |          | Il18     | Il18   |
| Itgam    |        |          | Bcl6     | Il1r2  |
| Itgb2    |        |          | Ccl5     | Il6ra  |
| Lta      |        |          | Ccl4     | Tollip |
| Mif      |        |          | Abcf1    |        |
| Scye1    |        |          | Cxcl10   |        |
| Tgfb1    |        |          | Ccl7     |        |
| Tnf      |        |          | Ccl12    |        |
| Tnfrsf1a |        |          | Il6ra    |        |
| Tnfrsf1b |        |          | C3       |        |
| Cd40lg   |        |          | Scye1    |        |
| Tollip   |        |          | Ccl2     |        |
| Xcr1     |        |          | Ccl19    |        |
|          |        |          | Il6st    |        |
|          |        |          | Il10rb   |        |
|          |        |          | Ccr5     |        |
|          |        |          | Itgam    |        |
|          |        |          | Il2rg    |        |
|          |        |          | Il1r1    |        |
|          |        |          | Spp1     |        |
|          |        |          | Tgfb1    |        |
|          |        |          | Mif      |        |
|          |        |          | Cx3cl1   |        |

---

Table 7. Plasma proteomic profiling results for WT and MMP-9 null mice

| Analyte      | WT Saline     | WT Aliskiren | WT Valsartan | WT A+V      | Null Saline   | Null Aliskiren | Null Valsartan | Null A+V      |
|--------------|---------------|--------------|--------------|-------------|---------------|----------------|----------------|---------------|
| Apo A-1      | 38.3±6.2      | 45.3±15.4    | 43.2±9.8     | 51.7±11.9   | 28.±1.2       | 79.4±18.9      | 58.3±10.9      | 59.3±14.3     |
| CD40         | 31.0±3.1      | 38.6±9.3     | 41.9±3.6     | 38.3±3.6    | 25.3±3.1      | 23.9±2.2       | 26.2±2.9†      | 22.7±1.2‡     |
| CD40-L       | 2620±404      | 2131±300     | 2624±518     | 2902±909    | 2686±332      | 2048±422       | 3333±679       | 1998±181      |
| CRP          | 4.4±0.3       | 5.7±0.3      | 5.8±0.4      | 6.3±0.5     | 6.3±0.4       | 6.5±0.3        | 6.0±0.6        | 6.4±0.5       |
| ET-1         | 58.5±7.0      | 68.3±9.2     | 51.7±5.8     | 56.5±8.0    | 86.2±5.2      | 64.9±11.6      | 68.7±7.9       | 65.5±5.6      |
| Eotaxin      | 1201±157      | 1081±207     | 1146±124     | 1032±166    | 1108±141      | 1181±112       | 985±101        | 1067±89       |
| EGF          | 100±27        | 138±34       | 157±65       | 169±95      | 121±26        | 96±21          | 212±93         | 141±28        |
| Factor VII   | 48.5±8.7      | 50.5±7.2     | 42.7±5.5     | 49.5±6.4    | 64.4±3.4      | 59.2±4.3       | 62.3±3.4       | 50.9±4.3      |
| Fibrinogen   | 48400±4712    | 48700±3689   | 69936±12012  | 58278±10710 | 47330±2082    | 53282±3987     | 42594±3771     | 55282±4341    |
| FGF-9        | ND            | ND           | ND           | ND          | ND            | ND             | ND             | ND            |
| FGF-Basic    | 93.0±24.3     | 57.4±12.1    | 86.2±19.3    | 49.9±10.6   | 38.1±1.3‡     | 36.6±2.3       | 37.3±1.9       | 51.3±9.2      |
| GST-alpha    | 0.059±0.005   | 7.95±4.55    | 0.31±0.10    | ND          | 3.13±1.05     | 0.16±0.04      | 0.07±0.01      | 0.35±0.03     |
| GCP-2        | 4.41±0.86     | 2.92±0.15    | 4.20±1.02    | 5.55±1.48   | 3.52±0.36     | 5.17±1.01      | 5.58±0.86      | ±0.48         |
| GM-CSF       | ND            | ND           | ND           | ND          | 2.16±0.00     | ND             | ND             | ND            |
| KC/GRO       | 0.10±0.03     | 0.11±0.03    | 0.11±0.02    | 0.14±0.03   | 0.21±0.02     | 0.13±0.07      | 0.26±0.08      | 0.26±0.12     |
| Haptoglobin  | 64±10         | 66±6         | 108±20       | 90±17       | 93±14         | 102±11         | 73±14          | 93±12         |
| IgA          | 145±89        | 91±22        | 64±12        | 115±51      | 118±25        | 95±13          | 98±9           | 90±10         |
| IFN-gamma    | 6.5±1.8       | 5.5±1.3      | ND           | 15.0±1.5    | ND            | 2.8±0.0        | 2.8±0.0        | 6.6±1.9       |
| IP-10        | 147±37        | 106±14       | 65±10        | 118±40      | 162±19        | 116±21         | 119±18         | 125±19        |
| IL-1 alpha   | 160±49        | 103±28       | 141±23       | 198±69      | 226±62        | 173±42         | 181±65         | 142±27        |
| IL-1 beta    | 4.2±0.6       | 4.9±0.8      | 3.7±0.4      | 4.8±0.8     | 6.4±0.5       | 8.5±2.4        | 7.2±0.5        | 5.4±0.6       |
| IL-10        | 118±8         | ND           | 103±7        | ND          | ND            | ND             | 115±14         | 103±9         |
| IL-11        | 300±115       | 40±7         | 50±7         | 96±15       | 111           | ND             | 118±29         | 60±6          |
| IL-12p70     | ND            | ND           | ND           | ND          | ND            | ND             | 0.09±0.02      | ND            |
| IL-17A       | 0.0062±0.0004 | ND           | ND           | 0.007±0.001 | 0.00534±0.000 | 0.006±0.001    | 0.007±0.000    | 0.0053±0.0002 |
| IL-18        | 14.6±2.8      | 20.2±3.4     | 16.8±2.5     | 20.1±3.4    | 23.3±1.6      | 21.1±0.9       | 22.8±1.9       | 17.3±1.4      |
| IL-2         | ND            | 13.7±1.7     | 10.1±0.0     | 14.9±1.4    | ND            | ND             | ND             | ND            |
| IL-3         | ND            | ND           | ND           | ND          | ND            | ND             | ND             | ND            |
| IL-4         | ND            | ND           | 25±4         | 39±7        | ND            | 41±8           | 36±6           | 52±6          |
| IL-5         | ND            | 0.30±0.05    | 0.29±0.06    | 0.49±0.10   | ND            | 0.19±0.02      | 0.29±0.05      | 0.21±0.02     |
| IL-6         | 29.7±7.7      | 29.7±7.7     | 35.2±9.0     | 67.4±30.6   | 13.0±1.7      | 10.0±2.2       | 21.4±5.0       | 19.1±4.1      |
| IL-7         | 0.130±0.014   | 0.185±0.007  | 0.090±0.016  | 0.145±0.021 | 0.193±0.008   | 0.210±0.081    | 0.181±0.030    | 0.211±0.026   |
| LIF          | 1679±313      | 1790±293     | 1454±219     | 1664±284    | 2296±100      | 1751±211       | 1967±195       | 1777±214      |
| Lymphotactin | 734±13        | 49±8         | 50±7         | 74±9        | 58±6          | 73±7           | 71±6           | 66±5          |
| M-CSF-1      | 4.8±0.2       | 4.7±0.2      | 4.4±0.3      | 4.8±0.2     | 4.6±0.2       | 4.6±0.1        | 4.6±0.1        | 4.5±0.1       |
| MIP-1 alpha  | 5.4±1.0       | 6.2±0.7      | 5.5±0.5      | 6.0±0.7     | 7.2±0.8       | 6.0±0.4        | 6.4±0.5        | 5.6±0.4       |
| MIP-1 beta   | 114±18        | 122±18       | 135±23       | 126±22      | 158±8         | 108±19         | 121±15         | 131±12        |
| MIP-1 gamma  | 19±2          | 20±1         | 21±2         | 20±3        | 24±2          | 20±1           | 21±2           | 20±1          |
| MIP-2        | 7.7±1.2       | 4.5±0.7      | 12.5±3.4     | 9.9±1.0     | 11.3±2.5      | 6.7±1.9        | 11.2±1.9       | 12.1±3.7      |
| MIP-3 beta   | 2.0±0.2       | 1.9±0.3      | 1.9±0.2      | 2.5±0.5     | 2.1±0.1       | 2.9±0.3        | 2.7±0.2        | 2.1±0.1       |
| MDC          | 2354±298      | 2474±693     | 2282±173     | 2157±330    | 2193±298      | 2642±303       | 2334±290       | 2205±238      |
| MMP-9        | 55±7          | 65±5         | 70±6         | 75±8        | ND            | ND             | ND             | ND            |
| MCP-1        | 58±11         | 57±11        | 107±21       | 96±29       | 97±14         | 79±8           | 94±19          | 117±30        |
| MCP-3        | 176±24        | 188±32       | 328±55       | 243±71      | 285±29        | 195±21         | 277±55         | 317±68        |
| MCP-5        | 17±2          | 17±4         | 25±5         | 23±6        | 22±3          | 19±2           | 20±2           | 22±3          |
| MPO          | 64±6          | 76±10        | 92±13        | 96±20       | 89±9          | 95±11          | 77±9           | 75±5          |
| Myoglobin    | 200±43        | 167±42       | 106±23       | 287±3       | 226±63        | 762±474        | 354±76         | 361±106       |
| OSM          | 0.097±0.033   | 0.070±0.008  | 0.071±0.017  | 0.103±0.010 | 0.068±0.006   | 0.070±0.014    | 0.092±0.019    | 0.059±0.006   |
| SAP          | 15.6±1.2      | 22.1±2.1     | 22.9±1.8     | 25.5±1.5    | 23.4±1.4      | 26.1±1.8       | 24.3±2.4       | 23.2±1.8      |
| SGOT         | 94±14         | 105±29       | 71±19        | 132±47      | 61±8          | 72±10          | 90±16          | 88±11         |
| SCF          | 290±50        | 232±18       | 290±32       | 302±41      | 211±10        | 775±549        | 228±17         | 228±16        |
| RANTES       | 0.069±0.015   | 0.0531±0.023 | 0.133±0.023  | 0.157±0.032 | ND            | 0.067±0.014    | 0.054±0.008    | 0.051±0.006   |
| TPO          | 35±7          | 38±6         | 31±5         | 40±5        | 53±3          | 40±4           | 44±4           | 37±3          |
| TF           | 10.1±1.4      | 10.3±1.7     | 10.5±1.3     | 12.1±2.0    | 11.7±1.2      | 12.2±0.9       | 13.1±1.1       | 9.6±0.9       |
| TIMP-1       | 0.90±0.12     | 1.44±0.49    | 2.46±0.51    | 2.87±0.96†  | 1.53±0.10     | 1.10±0.10      | 1.34±0.18      | 1.26±0.15‡    |
| TNF alpha    | 0.034±0.003   | 0.042±0.003  | 0.029±0.01   | 0.06±0.007  | 0.042±0.003   | ND             | 0.028          | 0.052±0.004   |
| VCAM-1       | 1036±72       | 1022±34      | 927±40       | 1005±81     | 1140±32       | 1065±34        | 1017±41        | 1005±24       |
| VEGF-A       | 514±282       | 224±31       | 409±115      | 2453±2244   | 257±45        | 272±44         | 614±288        | 240±27        |
| VWF          | 294±31        | 306±35       | 278±36       | 271±43      | 342±20        | 350±38         | 281±29         | 298±32        |

All values are reported as AVG±SEM. ND is non-detectable. † p<0.05 vs saline control; ‡ p<0.05 vs. WT counterpart



## References

1. Lindsey ML EG, Dobrucki LW, Bouges S, Mingoia JT, McClister DM Jr, Su H, Gannon J, MacMillivray C, Lee RT, Sinusas AJ, Spinale FG. Matrix metalloproteinase-9 gene deletion facilitates angiogenesis after myocardial infarction. *American Journal of Physiology Heart and Circulatory Physiology*. 2006;290:H232-239
2. Lin J LE, Jin YF, Van Remmen H, Bauch T, Han HC, Lindsey ML. Age-related cardiac muscle sarcopenia: Combining experimental and mathematical modeling to identify mechanisms. *Experimental gerontology*. 2008;43:296-306
3. Zamilpa R, Kanakia R, Cigarroa Jt, Dai Q, Escobar GP, Martinez HM, Jimenez F, Ahuja S, Lindsey ML. Cc chemokine receptor 5 deletion impairs macrophage activation and induces adverse remodeling following myocardial infarction. *American journal of physiology. Heart and circulatory physiology*. 2011
4. Zamilpa R KR, Cigarroa IV J, Dai Q, Escobar GP, Martinez H, Jimenez F, Ahuja SS, Lindsey ML. Cc chemokine receptor 5 deletion impairs macrophage activation and induces adverse remodeling following myocardial infarction. *American Journal of Physiology Heart and Circulatory Physiology*. 2011;300:H1418-1426
5. Michael LH, Ballantyne CM, Zachariah JP, Gould KE, Pocius JS, Taffet GE, Hartley CJ, Pham TT, Daniel SL, Funk E, Entman ML. Myocardial infarction and remodeling in mice: Effect of reperfusion. *The American journal of physiology*. 1999;277:H660-668
6. McCurdy SM DQ, Zhang J, Zamilpa R, Ramirez TA, Dayah T, Nguyen N, Jin YF, Bradshaw AW, Lindsey ML. Sparc mediates early extracellular matrix remodeling following myocardial infarction. *American Journal of Physiology Heart and Circulatory Physiology*. 2011;301:H497-505
7. Chiao YA DQ, Zhang J, Lin J, Lopez EF, Ahuja SS, Chou YM, Lindsey ML, Jin YF. Multi-analyte profiling reveals matrix metalloproteinase-9 and monocyte chemoattractant protein-1 as plasma biomarkers of cardiac aging. *Circulation: Cardiovascular Genetics*. 2011;4:455-463
8. Cox DR OD. *Analysis of survival data*. London: Chapman & Hall; 1984.
9. Lawless J. *Statistical models and methods for lifetime data, 2nd edition*. New York: Wiley; 2002.
10. Kalbfleish JD PR. *The statistical analysis of failure time data, 2nd edition*. New York: Wiley; 2002.
11. Lee ET WJ. *Statistical methods for survival data analysis, 3rd edition*. New York: Wiley; 2003.
12. Cheng Y CG. Biclustering of expression data. *Proceedings of International Conference Intelligent Systems Molecular Biology*. 2000;8:93-103
13. Madeira SC AL. Biclustering algorithms for biological data analysis. *IEEE/ACM Transactions on Computational Biology and Bioinformatics*. 2004:24-25
14. Lee M SH, Huang JZ, Marron JS. Biclustering via sparse singular value decomposition. *Biometrics*. 2010:1087-1095
15. Chen K CK, Stenseth NC. Reduced rank stochastic regression with a sparse singular value decomposition. *Journal of the Royal Statistical Society*. 2011:203-221
